# Supplementary material for: Identification of Novel β-Tubulin Inhibitors Using a Combined In Silico/In Vitro Approach
Source: PubMed Central journal article supplement (PMC10598795; doi:10.1021/acs.jcim.3c00939), 2023-09-29
Supplement: ci3c00939_si_001.pdf [file ci3c00939_si_001.pdf]

# Identification of Novel $\beta$ -Tubulin Inhibitors Using a Combined *In Silico/In Vitro* Approach

Mark James Horgan<sup>1</sup>, Lukas Zell<sup>2</sup>, Bianka Siewert<sup>1</sup>, Hermann Stuppner<sup>1</sup>, Daniela Schuster<sup>2</sup>  
and \*Veronika Temml<sup>2</sup>

<sup>1</sup>Institute of Pharmacy/Pharmacognosy, Center for Chemistry and Biomedicine, University of Innsbruck, Innrain 80-82, 6020 Innsbruck, Austria. <sup>2</sup>Institute of Pharmacy, Department of Pharmaceutical and Medicinal Chemistry, Paracelsus Medical University Salzburg, Strubergasse 21, 5020 Salzburg, Austria.

\*E-mail: veronika.temml@pmu.ac.at

## Supporting Information

### 1. Actives dataset generation

**Table S1.** List of ligands active against tubulin used to generate the actives dataset for pharmacophore model training.

| ID  | Name          | Tubulin activity                       | SMILES                                         | Reference |
|-----|---------------|----------------------------------------|------------------------------------------------|-----------|
| AS1 | Thiabendazole | 81.6 $\pm$ 1% inhibition at 20 $\mu$ M | <chem>C1=CC=C2C(=C1)NC(=N2)C3=CSC=N3</chem>    | 1         |
| AS2 | Albendazole   | IC <sub>50</sub> = 6.9 $\mu$ M         | <chem>CCCSC1=CC2=C(C=C1)N=C(N2)NC(=O)OC</chem> | 2         |

|      |               |                                                                  |                                                                          |       |
|------|---------------|------------------------------------------------------------------|--------------------------------------------------------------------------|-------|
| AS3  | Fenbendazole  | IC <sub>50</sub> = 5.4 μM                                        | COC(=O)Nc1nc2ccc(Sc3c<br>cccc3)cc2[nH]1                                  | 2     |
| AS7  | Mebendazole   | IC <sub>50</sub> = 6.1 μM                                        | COC(=O)NC1=NC2=C(N1)<br>C=C(C=C2)C(=O)C3=CC=<br>CC=C3                    | 2     |
| AS8  | Flubendazol   | IC <sub>50</sub> = 3.5 μM                                        | COC(=O)Nc1nc2cc(C(=O)<br>c3ccc(F)cc3)cc2[nH]1                            | 2     |
| AS9  | Parbendazol   | IC <sub>50</sub> = 3.1 μM                                        | CCCCc1ccc2[nH]c(NC(=O)<br>)OC)nc2c1                                      | 2     |
| AS10 | Oxfendazole   | IB <sub>50</sub> = 1.3 μM<br>(Mebendazole<br>inhibitory binding) | COC(=O)NC1=NC2=C(N1)<br>C=C(C=C2)S(=O)C3=CC=<br>CC=C3                    | 3     |
| AS11 | Oxibendazole  | IC <sub>50</sub> = 2.4 μM                                        | CCCOc1ccc2[nH]c(NC(=<br>O)OC)nc2c1                                       | 2     |
| AS5  | Nocodazole    | IC <sub>50</sub> = 1.82 ± 0.06 μM                                | COC(=O)NC1=NC2=C(N1)<br>C=C(C=C2)C(=O)C3=CC=<br>CS3                      | 4     |
| AS12 | CHEMBL459773  | IC <sub>50</sub> = 4.23 μM                                       | COC1=C(OC)C(OC)=CC(C<br>(C2=CSC(C3=CC=CC=C3)<br>=N2)=O)=C1               | 5     |
| AS13 | CHEMBL3426932 | IC <sub>50</sub> = 2.36 μM                                       | COC1=C(OC)C(OC)=CC(C<br>2=C(C3=CC=C(OC)C=C3<br>)N=C(N)S2)=C1             | 6     |
| AS14 | CHEMBL273081  | IC <sub>50</sub> = 16.75 μM                                      | C1C1=C(N=C2S/C(C(N/2<br>)=O)=C/C3=CC=C(N(C)C<br>C=C3)C=CC=C1             | 7     |
| AS15 | 24045-22-5    | IC <sub>50</sub> = 4.0 ± 0.6 μM                                  | O=C(N/1)/C(SC1=N\C2=<br>CC=C(O)C=C2)=C\C3=CC<br>(OC)=C(O)C=C3            | 8     |
| AS16 | 1596344-07-8  | IC <sub>50</sub> = 5.6 ± 0.3 μM                                  | O=C(N/1)/C(SC1=N\C2=<br>CC=C(OC3=CC=CC=C3)C<br>=C2)=C\C4=C(O)C=CC=C<br>4 | 8     |
| AS17 | 463979-31-9   | IC <sub>50</sub> = 6.28 μM                                       | O=C(N/1)/C(SC1=N\C2=<br>CC=C(O)C=C2)=C\C3=CC<br>(OC)=CC=C3               | 9     |
| AS4  | 356542-94-4   | IC <sub>50</sub> = 1.5 μM                                        | O=C(C1=CC(OC)=C(O)C=<br>C1)/C=C/C2=C(OC)C=C(<br>OC)C=C2OC                | 10,11 |
| AS18 | CHEMBL1163178 | IC <sub>50</sub> = 6.8 ± 0.6 μM                                  | O=C(C1=CC=C(C1)C=C1)C<br>C(SC(N(CC)CC)=S)C2=CC<br>=CC=C2                 | 12    |
| AS19 | CHEMBL220818  | IC <sub>50</sub> = 2.2 μM                                        | O=C(C1=CC(OC)=C(OC)C<br>(OC)=C1)/C=C/C2=CC=C(<br>C=CC=C3)C3=C2           | 13    |
| AS20 | CHEMBL285901  | IC <sub>50</sub> = 2.8 μM                                        | O=C(C1=CC(OC)=C(OC)C<br>(OC)=C1)/C=C/C2=CC=C(<br>N(C)C)C=C2              | 13    |
| AS21 | 1585234-76-9  | IC <sub>50</sub> = 1.6 ± 0.32 μM                                 | COC1=C(C(OC)=CC(OC)=<br>C1)/C=C/C2=CC(N)=CC<br>=C2)=N\O                  | 14    |
| AS22 | CHEMBL3393090 | IC <sub>50</sub> = 1.3 ± 0.0 μM                                  | OC1=CC(/C=C/C(C2=CC=<br>CC=C2C3=CC=C(F)C=C3)<br>=O)=CC=C1OC              | 15    |
| AS23 | CHEMBL3393091 | IC <sub>50</sub> = 3.4 ± 0.2 μM                                  | FC(C=C1)=CC=C1C2=CC=<br>CC=C2C(/C=C/C3=CC=C(<br>OC)C(B(O)O)=C3)=O        | 15    |
| AS24 | CHEMBL3393092 | IC <sub>50</sub> = 3.6 ± 0.0 μM                                  | FC(C=C1)=CC=C1C2=CC=<br>CC=C2C(/C=C/C3=CC=C(<br>N(C)C)C=C3)=O            | 15    |
| AS25 | CHEMBL3393099 | IC <sub>50</sub> = 0.49 ± 0.27 μM                                | FC1=CC=CC(C2=CC=CC=<br>C2C(/C=C/C3=CC=C(C(O)<br>=C3)OC)=O)=C1            | 15    |
| AS26 | CHEMBL3818930 | IC <sub>50</sub> = 1.99 ± 0.03 μM                                | O=C(/C(CC1=C2OC)=C/C<br>3=C4C=CNC4=CC=C3)C1<br>=CC(OC)=C2OC              | 16    |
| AS27 | CHEMBL3818850 | IC <sub>50</sub> = 2.68 ± 0.15 μM                                | O=C(C1=CC(OC)=C(OC)C<br>(OC)=C1)/C(C)=C/C2=CN<br>C3=C2C=CC(OC)=C3        | 17    |

|      |                                                        |                                   |                                                                                                          |    |
|------|--------------------------------------------------------|-----------------------------------|----------------------------------------------------------------------------------------------------------|----|
| AS28 | CHEMBL595808                                           | IC <sub>50</sub> = 12 μM          | COC1=C(OC)C(OC)=CC(C<br>(/C=C/C2=C(OC)C=C(OC)<br>C=C2OC)=O)=C1                                           | 18 |
| AS29 | CHEMBL9859                                             | IC <sub>50</sub> = 0.46 μM        | COC1=C(OC)C(OC)=CC(C<br>(/C(C)=C/C2=CC=C(OC)C<br>(O)=C2)=O)=C1                                           | 19 |
| AS30 | CHEMBL107                                              | IC <sub>50</sub> = 6.7 ± 0.05 μM  | CC(=O)N[C@H]1CCCC2=C<br>C(=C(C(=C2C3=CC=C(C(=O)<br>C=C13)OC)OC)OC)OC                                     | 20 |
| AS31 | CHEMBL208189                                           | IC <sub>50</sub> = 8.3 μM         | CC(=O)CN[C@H]1CCCC2=<br>CC=C(C(=C2C3=CC=C(C(=<br>=O)C=C13)OC)OC)OC)O<br>C                                | 21 |
| AS32 | CHEMBL206877                                           | IC <sub>50</sub> = 4.6 ± 0.17 μM  | COC1=CC=C2C(=CC1=O)<br>[C@H](CCC3=CC(=C(C(=C32)<br>OC)OC)OC)NC4=C(C=C(C=C4)<br>[N+](=O)[O-])[N+](=O)[O-] | 21 |
| AS33 | CHEMBL2180999                                          | IC <sub>50</sub> = 1.62 μM        | COC1=CC=C2C(=CC1=O)<br>[C@H](CCC3=CC(=C(C(=C32)<br>OC)OC)OC)NCC4=C(C(=CC=C4)<br>F)F                      | 22 |
| AS34 | CHEMBL4553296                                          | IC <sub>50</sub> = 0.05 μM        | O(C)C1=C2C=3C([C@@<br>H](NC(C)=O)CCC2=CC(O<br>C)=C1OC)=CC(=O)C(NC4<br>=CC(C(F)(F)F)=C(C)C=C4<br>)=CC3    | 23 |
| AS35 | CHEMBL1946973                                          | IC <sub>50</sub> = 1.1 ± 0.1 μM   | COC1=C(OC)C(OC)=CC(N<br>2C(C3=CC=C(OCC)C=C3)<br>=NN=N2)=C1                                               | 24 |
| AS36 | CHEMBL1823147                                          | IC <sub>50</sub> = 3.0 ± 0.6 μM   | COC1=C(OC)C(OC)=CC(C<br>(C2=C(C)OC3=C(O)C(OC)<br>=CC=C23)=O)=C1                                          | 25 |
| AS37 | CHEMBL3580699                                          | IC <sub>50</sub> = 14 ± 2.2 μM    | COC1=C(OC)C(OC)=CC(C<br>2=C(NC3=CC=C(OC)C=C<br>3)N(C=CC=C4)C4=N2)=C<br>1                                 | 26 |
| AS38 | 7-Methoxy-4-(3,4,5-trimethoxyphenyl)quinolin-2(1H)-one | IC <sub>50</sub> = 2.56 ± 0.15 μM | COC1=C(OC)C(OC)=CC(C<br>(C2=CC=C(CC)=C2N3)=<br>CC3=O)=C1                                                 | 27 |
| AS39 | CHEMBL221765                                           | IC <sub>50</sub> = 2.0 μM         | COC1=CC(SC2=C(C(OC)=<br>O)NC3=CC=C(OC)C=C23)<br>=CC(OC)=C1OC                                             | 28 |
| AS40 | CHEMBL380871                                           | IC <sub>50</sub> = 4.5 ± 0.1 μM   | COC1=CC(SC2=C(C(OC)=<br>O)NC3=CC=C([N+](O-))<br>)=O)C=C23)=CC(OC)=C1<br>OC                               | 29 |
| AS41 | 1179587-98-4                                           | IC <sub>50</sub> = 1.3 ± 0.1 μM   | COC1=CC(SC2=C(C(OC)=<br>O)NC3=CC=C(Br)C=C23)<br>=CC(OC)=C1OC                                             | 30 |
| AS42 | 1179588-09-0                                           | IC <sub>50</sub> = 0.67 ± 0.02 μM | COC1=CC(C(C2=C(C(OC)<br>=O)NC3=CC=C(OC)C=C2<br>3)=O)=CC(OC)=C1OC                                         | 30 |
| AS43 | 1839121-23-1                                           | IC <sub>50</sub> = 8.3 μM         | O=C(C(NC1=CC=C(OC)N<br>=C1)=O)C2=CN(CC3OCC<br>C3)C4=C2C=CC=C4                                            | 31 |
| AS44 | CHEMBL3747333                                          | IC <sub>50</sub> = 6.6 μM         | O=C(C(NC1=CC=C(OC(C)<br>C)N=C1)=O)C2=CN(CCO<br>C)C3=C2C=CC=C3                                            | 31 |
| AS45 | 1582297-75-3                                           | IC <sub>50</sub> = 1.65 μM        | CC1=C([Se])(C2=CC(OC)=<br>C(OC)C(OC)=C2)=O)C3=<br>C(N1)C=CC=C3                                           | 32 |
| AS46 | CHEMBL4092940                                          | IC <sub>50</sub> = 11.2 ± 1.13 μM | C1C1=CC(NC(C(C2=CC=C<br>S2)=O)=C3NC4=C([N+](O-<br>))=O)C=NC(N5CCN(C)CC<br>5)=N4)=C3C=C1                  | 33 |
| AS47 | CHEMBL1940254                                          | IC <sub>50</sub> = 1.1 ± 0.5 μM   | COC1=CC(SC2=C(C3=CC<br>=CN3)NC4=CC=CC=C24)<br>=CC(OC)=C1OC                                               | 34 |

|      |                            |                                       |                                                                         |    |
|------|----------------------------|---------------------------------------|-------------------------------------------------------------------------|----|
| AS48 | CHEMBL1940258              | IC <sub>50</sub> = 0.74 ± 0.05 μM     | COC1=CC(SC2=C(C3=CC=CC3)NC4=CC=CC=C24)=CC(OC)=C1OC                      | 34 |
| AS49 | CHEMBL2313790              | IC <sub>50</sub> = 1.3 ± 0.06 μM      | COC1=CC(SC2=C(N3C=CN=C3)NC4=CC=CC=C24)=CC(OC)=C1OC                      | 35 |
| AS50 | CHEMBL3597212              | IC <sub>50</sub> = 1.1 ± 0.1 μM       | COC1=CC(SC2=C(C3=CC=CC=C3)NC4=CC(OC)=CC=C24)=CC(OC)=C1OC                | 36 |
| AS51 | CHEMBL3597223              | IC <sub>50</sub> = 1.2 ± 0.1 μM       | COC1=CC(=CC(=C1OC)O)C)SC2=C(NC3=C2C=CC(=C3C)C)C4=CC=CC=C4               | 36 |
| AS52 | CHEMBL89341                | IC <sub>50</sub> = 1.1 ± 0.4 μM       | COC1=CC(C(C2=C(C3=CC(O)=C(OC)C=C3)NC4=CC(OC)=CC=C24)=O)=CC(OC)=C1OC     | 37 |
| AS53 | CHEMBL2442345              | IC <sub>50</sub> = 1.1 ± 0.4 μM       | COC1=CC(C(C2=C(C3=CC(O)=C(OC)C=C3)NC4=C(OC)C(OC)=CC=C24)=O)=CC(OC)=C1OC | 37 |
| AS54 | CHEMBL20684                | IC <sub>50</sub> = 2.2 μM             | COC1=CC=C(S(NC2=CC=CN=C2NC3=CC=C(O)C=C3)(=O)=O)C=C1                     | 38 |
| AS55 | CHEMBL281995               | IC <sub>50</sub> = 2.1 μM             | COC1=CC=C(S(NC2=C3C(C=C(C)N3)=CC=C2)(=O)=O)C=C1                         | 38 |
| AS56 | CHEMBL20289                | IC <sub>50</sub> = 9.5 μM             | COC1=CC=C(S(NC2=C3C(C(C)C)N3)=CC=C2)(=O)=O)C=C1                         | 38 |
| AS57 | CHEMBL20296                | IC <sub>50</sub> = 88.5 μM            | C1C1=CC=C(S(NC2=C3C(C=C(C)N3)=CC=C2)(=O)=O)C=C1                         | 39 |
| AS58 | CHEMBL20800                | IC <sub>50</sub> = 2.9 μM             | CC1=CC=C(C=C1)S(=O)(=O)NC2=CC=CC3=C2NC(=C3)O                            | 39 |
| AS59 | SCHEMBL3072090             | IC <sub>50</sub> = 2.5 μM             | CC1=CC=C(S(NC2=C3C(C(C)N3)=O)=CC=C2)(=O)=O)C=C1                         | 40 |
| AS60 | CHEMBL216379               | IC <sub>50</sub> = 1.1 ± 0.1 μM       | O=C(NC1=C2C(CCN2S(C3=CC=C(OC)C=C3)(=O)=O)=CC=C1)C4=CC=NC=C4             | 41 |
| AS61 | CHEMBL216327               | IC <sub>50</sub> = 1.2 ± 0.1 μM       | O=C(NC1=C2C(CCN2S(C3=CC=C(OC)C=C3)(=O)=O)=CC=C1)C4=CC=CO4               | 41 |
| AS62 | CHEMBL230296               | IC <sub>50</sub> = 0.6 μM             | COC1=NC(OC)=C(NS(C2=CC3=C(N(C)C4=C3C=CC=C4)C=C2)(=O)=O)C=C1             | 42 |
| AS63 | CHEMBL79280<br>(Betabulin) | IC <sub>50</sub> = 2 μM               | COC1=C(F)C=C(NS(C2=C(F)C(F)=C(F)C(F)=O)=O)C=C1                          | 43 |
| AS64 | CHEMBL2397992              | IC <sub>50</sub> = 3.68 μM            | COC1=CC(OC)=CC(OC)=C1/C=C/S(NC2=CC=C(OC)C(N)=C2)(=O)=O                  | 44 |
| AS65 | CHEMBL141689               | IC <sub>50</sub> = 3.6 μM             | COC1=CC=C(CNC2=NC(NC3=CC=C(OC)C=C3)=C4C(N(C(C)C)C=N4)=N2)C=C1           | 45 |
| AS66 | CHEMBL2001473              | Tubulin polymerization<br>MIC = 20 μM | COC1=CC=C(CNC2=NC(NC3=CC=C(OC)C=C3)=NC(NC4CCCC4)=N2)C=C1                | 46 |
| AS67 | CHEMBL1968484              | Tubulin polymerization<br>MIC = 10 μM | COC1=CC=C(CNC2=NC(NC3=CC=C(OC)C=C3)=NC(NC(C)C)=N2)C=C1                  | 46 |
| AS68 | CHEMBL1976996              | Tubulin polymerization<br>MIC = 5 μM  | COC1=C(OC)C=C(CNC2=NC(NCC3=CC=C(OC)C=C3)=NC(NC4CCCC4)=N2)C=C1           | 46 |

|      |                |                                                              |                                                                                                  |    |
|------|----------------|--------------------------------------------------------------|--------------------------------------------------------------------------------------------------|----|
| AS69 | CHEMBL141477   | IC <sub>50</sub> = 2 μM                                      | COC1=CC=C(CNC2=NC(NCC3=CC=C(OC)C=C3)=C4C(N(C5CCCCC5)C=N4)=N2)C=C1                                | 47 |
| AS70 | SCHEMBL2905972 | IC <sub>50</sub> = 16 ± 2 μM                                 | COC1=CC=C(CNC2=NC(NCC3=CC=C(OC)C=C3)=C4C(C(C(C)C)=NN4)=N2)C=C1                                   | 48 |
| AS71 | CHEMBL513813   | IC <sub>50</sub> = 3.4 μM                                    | COC1=CC=C(CNC2=NC3=CC=NN3C(NCC4=CC=C(OC)C=C4)=N2)C=C1                                            | 45 |
| AS72 | CHEMBL466716   | IC <sub>50</sub> = 3.6 μM                                    | COC1=CC=C(CNC2=NC3=C(C(C(C)C)=NN3C(NCC4=CC=C(OC)C=C4)=N2)C=C1                                    | 45 |
| AS6  | CHEMBL61       | IC <sub>50</sub> = 1.3 ± 0.06 μM                             | COC(C=C([C@H]1C2[C@H](COC2=O)[C@@H](O)C3=CC4=C(OCO4)C=C13)C=C5OC)=C5OC                           | 49 |
| AS73 | CHEMBL2165487  | IC <sub>50</sub> = 7.7 ± 1.1 μM                              | COc1cc([C@H]2c3cc4c(cc3[C@](O)(C3(O)CCC33)[C@H]3COC(=O)[C@H]23)OCO4)cc(OC)c1OC                   | 50 |
| AS74 | CHEMBL2165463  | 21.1 % inhibition at 1 μM                                    | COc1cc([C@H]2c3cc4c(cc3[C@](O)(C3(O)COC33)[C@H]3COC(=O)[C@H]23)OCO4)cc(OC)c1OC                   | 50 |
| AS75 | CHEMBL2165468  | 84.5% inhibition at 1 μM (IC <sub>50</sub> = 0.45 ± 0.05 μM) | O=C1[C@@]2([C@@H](C=3C([C@H]([C@@H](C)C)[C@]2(CO1)[H])=CC4=C(C3)OCO4)C5=CC(OC)=C(OC)C(OC)=C5)[H] | 50 |
| AS76 | 266685-31-8    | IC <sub>50</sub> = 0.17 μM                                   | COC(C=C(C1C2=C(COC2=O)NC3=CC4=C(OCO4)C=C13)C=C5OC)=C5OC                                          | 51 |
| AS77 | 1260403-30-2   | IC <sub>50</sub> = 0.27 μM                                   | O=C1OCC2=C1C(C3=CC4=C(C=C3N2)OCO4)/C=C/C5=CC(OC)=C(OC)C(OC)=C5                                   | 51 |
| AS78 | CHEMBL114642   | IC <sub>50</sub> = 2.3 μM                                    | O=C1C2=C(C=CC=C2)C(C3=CC=C(OC)C(O)=C3)C4=CC=CC=C41                                               | 52 |
| AS79 | CHEMBL392633   | IC <sub>50</sub> = 0.56 μM                                   | COC1=CC=C(C=C1)S(=O)(=O)OC2=C3C=CC=CC3=CC4=CC=CC=C42                                             | 53 |
| AS80 | CHEMBL455138   | IC <sub>50</sub> = 0.52 μM                                   | O=C1C2=C(C=CC=C2)/C(C3=CC=CC=C31)=C\C(C4=CC=C(OC)C=C4)=O                                         | 54 |
| AS81 | CHEMBL1210677  | IC <sub>50</sub> = 1.5 μM                                    | O=C1C2=C(C=CC=C2)/C(C3=CC=CC=C31)=N\OCC4=CC=C(OC)C=C4                                            | 55 |
| AS82 | CHEMBL1814612  | IC <sub>50</sub> = 0.44 μM                                   | O=C1C2=C(C=CC=C2)/C(C3=CC=CC=C31)=N\C4=CC=C(OC)C(O)=C4                                           | 56 |
| AS83 | CHEMBL1814615  | IC <sub>50</sub> = 1.11 μM                                   | O=C1C2=C(C=CC=C2Cl)/C(C3=CC=CC(Cl)=C31)=N\C4=CC=C(OC)C(O)=C4                                     | 56 |
| AS84 | CHEMBL4585656  | 51.0 ± 11.2 % inhibition at 10 μM                            | OC1=C(C)C=C2C([C@H](C)CC/C=C(C)C2)=C1                                                            | 57 |
| AS85 | CHEMBL4551469  | 56.3 ± 7.5 % inhibition at 10 μM                             | C[C@H]1C2=CC(OC(C3=CC=CC=C3)=O)=C(C)C=C2/C(C)=C\CC1                                              | 57 |
| AS86 | 2301070-52-8   | 58.1 ± 25.3 % inhibition at 10 μM                            | OC1=C(C)C=C2C([C@H](C)CCC/C(C)=C\2)=C1                                                           | 57 |
| AS87 | CHEMBL4590152  | 38.7 ± 25.4 % inhibition at 10 μM                            | C[C@H]1C2=CC(OC(C3=CC=CC=C3)=O)=C(C)C=C2/C=C(C)\CCC1                                             | 57 |

|             |               |                                   |                                                                 |    |
|-------------|---------------|-----------------------------------|-----------------------------------------------------------------|----|
| <b>AS88</b> | CHEMBL4542864 | 46.9 ± 5.3 % inhibition at 10 µM  | OC1=C(C)C=C2C([C@H](C)CC[C@H]3[C@](C)(O3)C2)=C1                 | 57 |
| <b>AS89</b> | CHEMBL4550701 | 47.9 ± 8.1 % inhibition at 10 µM  | C[C@H]1C2=CC(OC(C3=CC=CC=C3)=O)=C(C)C=C2C[C@@](C)(O4)[C@@H]4CC1 | 57 |
| <b>AS90</b> | CHEMBL4553976 | 30.3 ± 5.4 % inhibition at 10 µM  | OC1=C(C)C=C2C([C@H](C)CCC[C@@]3(C)[C@@H]2O3)=C1                 | 57 |
| <b>AS91</b> | CHEMBL4538683 | 97.9 ± 15.3 % inhibition at 10 µM | C[C@H]1C2=CC(OC(C3=CC=CC=C3)=O)=C(C)C=C2[C@@H](O4)[C@]4(C)CC1   | 57 |
| <b>AS92</b> | CHEMBL4567416 | 43.7 ± 27.5 % inhibition at 10 µM | OC1=C(C)C=C2C([C@](C)(O3)CC[C@H]3[C@H](C)C2)=C1                 | 57 |
| <b>AS93</b> | CHEMBL4582836 | 26.1 ± 15.8 % inhibition at 10 µM | C[C@]1(O2)C3=CC(OC(C4=CC=CC=C4)=O)=C(C)C=C3C[C@@H](C)[C@@H]2CC1 | 57 |
| <b>AS94</b> | CHEMBL4578873 | 38.7 ± 2.5 % inhibition at 10 µM  | OC1=C(C)C=C2C([C@@]3(C)CCC[C@H](C)[C@@H]2O3)=C1                 | 57 |
| <b>AS95</b> | CHEMBL4593906 | 9.2 ± 4.1 % inhibition at 10 µM   | C[C@]12C3=CC(OC(C4=CC=CC=C4)=O)=C(C)C=C3[C@@H](O2)[C@@H](C)CCC1 | 57 |

## 2. Description and optimisation of pharmacophore models

### Model SB1

Pharmacophore SB1 was derived from Nocodazole bound to chain B of porcine tubulin (PDB: 5CA1).<sup>58</sup> Based on the automatically generated pharmacophore model, removal and tolerance adjusting of features and Xvols coat modifications, led to the model consisting of two HC features and one HBD (interaction with GLU198B). LB pharmacophore features from active compounds **AS2**, **AS7**, **AS8**, **AS10**, and **AS11** were merged, and the feature coordinates were extracted and manually added to model SB1, leading to the final model consisting of an additional HBD, two HBAs, two AI features and eleven Xvols.

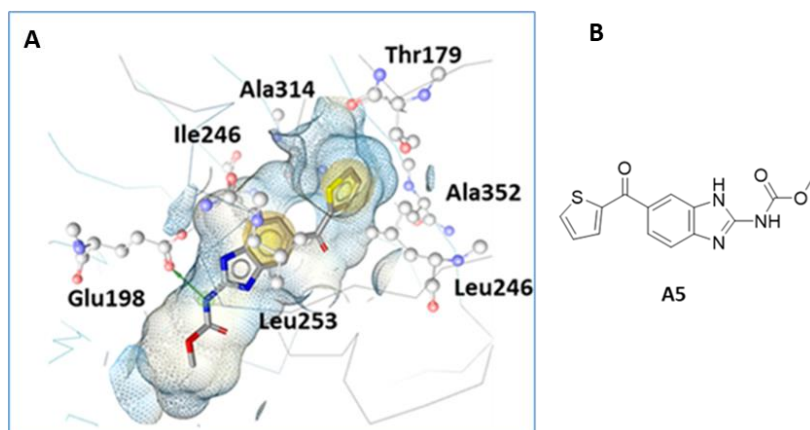

**Figure S1.** A) Automatically generated pharmacophore model of Tubulin CBS 3D crystal structure complex with nocodazole **AS5** based on (PDB 5CA1)<sup>58</sup>, B) Structure of the ligand nocodazole **AS5**.

### Model SB2

Pharmacophore model SB2 was derived from [2-(1H-indol-4-yl)-1H-imidazol-4-yl](3,4,5-trimethoxyphenyl)methanone bound to chain B of bovine tubulin (PDB: 6O5M).<sup>59</sup> Based on the automatically generated pharmacophore model, removal and tolerance adjusting of features and Xvols coat modifications, led to the model consisting of one HC feature, three HBAs towards HOH67B and Cys239B, two HBDs (interactions with Thr179A, ASN347B), and 18 Xvols.

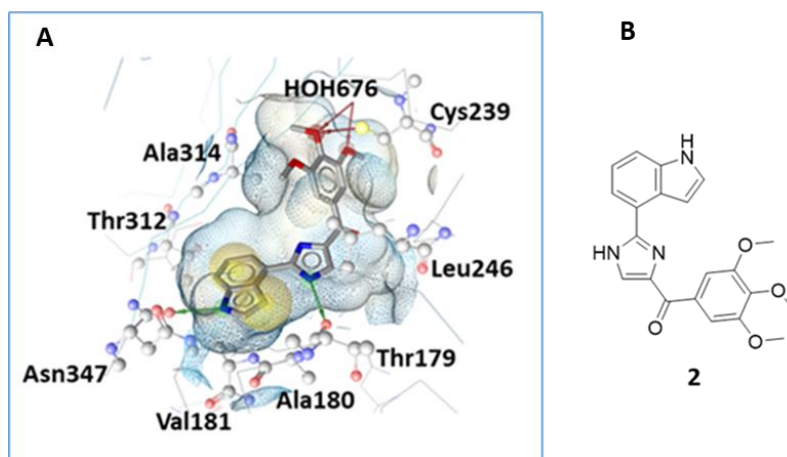

**Figure S2.** A) Automatically generated pharmacophore model of Tubulin CBS 3D crystal structure complex with the indol-imidazol-trimethoxyphenyl **2** based on (PDB 6O5M)<sup>59</sup>, B) Structure of the ligand **2**.

### Model LB3

Pharmacophore model LB3 was developed by automatic clustering of **AS55**, **AS56**, **AS57**, **AS63**, **AS85**, **AS86**, **AS87**, **AS88**, **AS89**, **AS90**, **AS91**, **AS92**, **AS93**, **AS94**, and **AS95** and creating a merged feature pharmacophore. After automatic pharmacophore model generation, removal and tolerance adjusting of features and Xvols coat modifications were optimised to find as many actives as possible while excluding inactives. The final model contained one AI feature, three HC features, two HBAs and 36 Xvols.



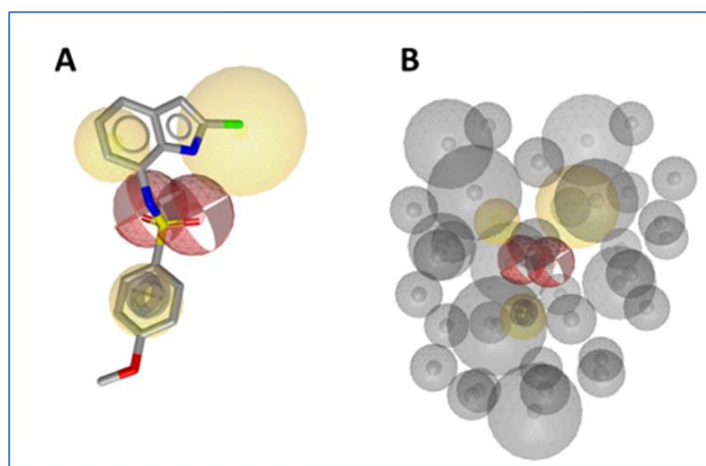

**Figure S3.** A) Optimised LB pharmacophore model LB3 aligned with base ligand **AS55** and B) the model LB3 with Xvols spheres. (HC, yellow spheres), (AI, purple sphere) Hydrogen bond (HBA; red arrows/spheres), and (Xvols; grey sphere).

#### **Model LB4**

Pharmacophore model LB4 was developed by automatic clustering and aligning the myosverin derivatives **AS66**, **AS67**, **AS68**, **AS69**, **AS70**, **AS71**, and **AS72** and creating a merged feature pharmacophore. After automatic pharmacophore model generation, removal and tolerance adjusting of features and Xvols coat modifications were optimised to find as many actives as possible while excluding inactives. The final model contained two HC features, five HBAs, two HBDs and 54 Xvols.

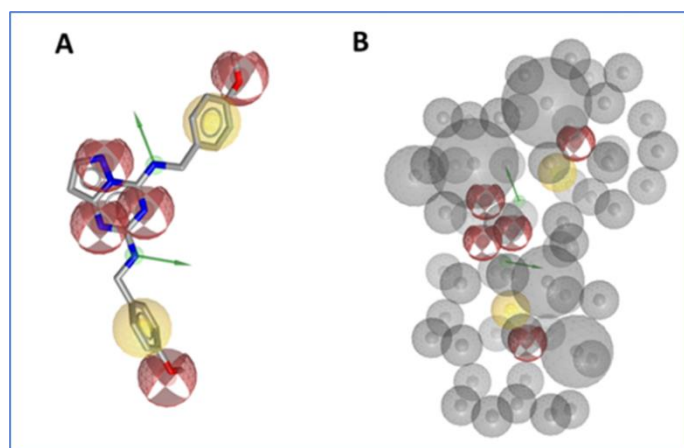

**Figure S4.** A) Optimised LB pharmacophore model LB4 aligned with base ligand **AS71** and B) the model LB4 with Xvol spheres. (HC, yellow spheres), (AI, purple sphere), (HBD; green arrows/spheres), Hydrogen bond acceptors (HBA; red arrows/spheres), and (Xvols; grey sphere).

### Model LB5

Pharmacophore model LB5 was developed by automatic clustering and aligning the sesquiterpenoids **AS85**, **AS86**, **AS87**, **AS88**, **AS89**, **AS90**, **AS91**, **AS92**, **AS93**, and **AS94** and creating a merged features pharmacophore. After automatic pharmacophore model generation, removal and tolerance adjusting of features and Xvols coat modifications were optimised to find as many actives as possible while excluding inactives. The final model contained one AI feature, three HC features, one HBA, and 49 Xvols.

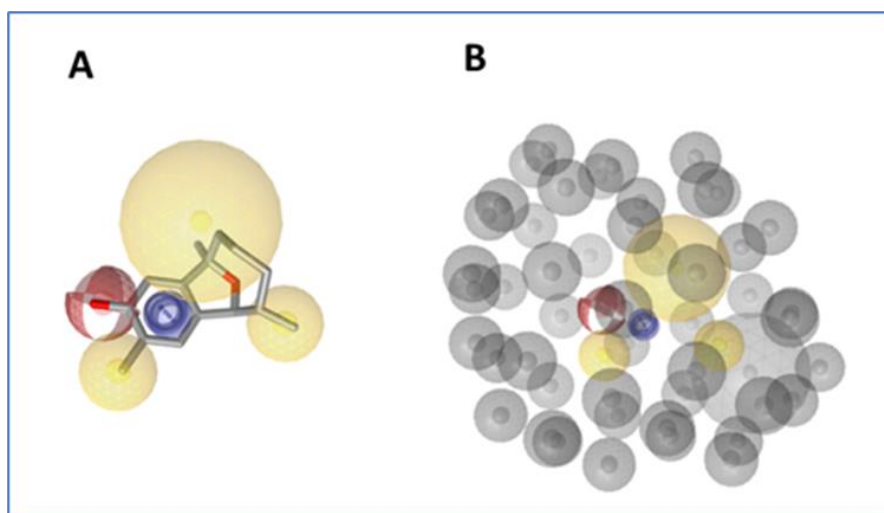

**Figure S5.** A) Optimised LB pharmacophore model LB5 aligned with base ligand **AS94** and B) the model LB5 with Xvols spheres. (HC, yellow spheres), (AI, purple sphere), (HBA; red arrows/spheres), and (Xvols; grey sphere).

### Model LB6

Pharmacophore model LB6 was developed by manually selecting and aligning the indole-sulfonamide derivatives **AS58**, **AS59**, **AS60**, and **AS61**, creating a shared features pharmacophore. After automatic pharmacophore model generation, removal and tolerance adjusting of features and Xvols coat modifications were optimised to find as many actives as possible while excluding inactives. The final model contained two AI features, two HC features, two HBAs, one HBD and 35 Xvols.

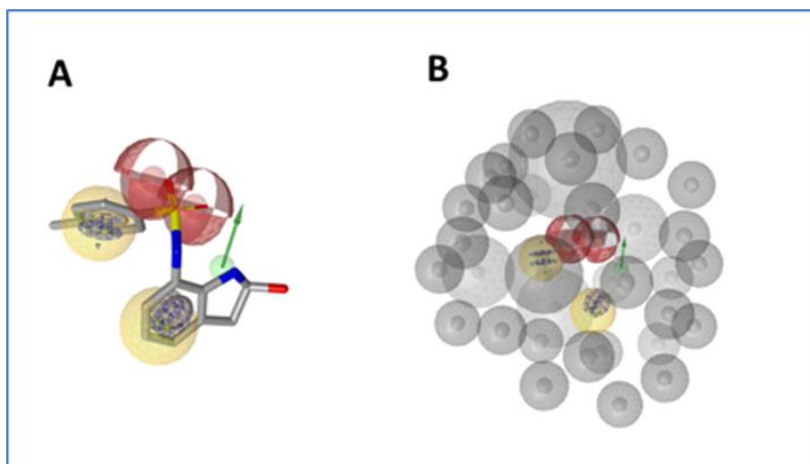

**Figure S6.** A) Optimised LB pharmacophore model LB6 aligned with base ligand **AS59** and B) the model LB6 with Xvol spheres. (HC, yellow spheres), (AI, purple sphere), (HBD; green arrows/spheres), (HBA; red arrows/spheres), and (Xvols; grey sphere).

### Model LB7

Pharmacophore model LB7 was developed by manually selecting and aligning **AS30**, **AS33**, **AS34**, **AS75**, and **AS77** and creating a merged features pharmacophore. After automatic pharmacophore model generation, removal and tolerance adjusting of features and Xvols coat modifications were optimised to find as many actives as possible while excluding inactives. The final model contained one AI feature, one HC feature, four HBAs, one HBD and 68 Xvols.

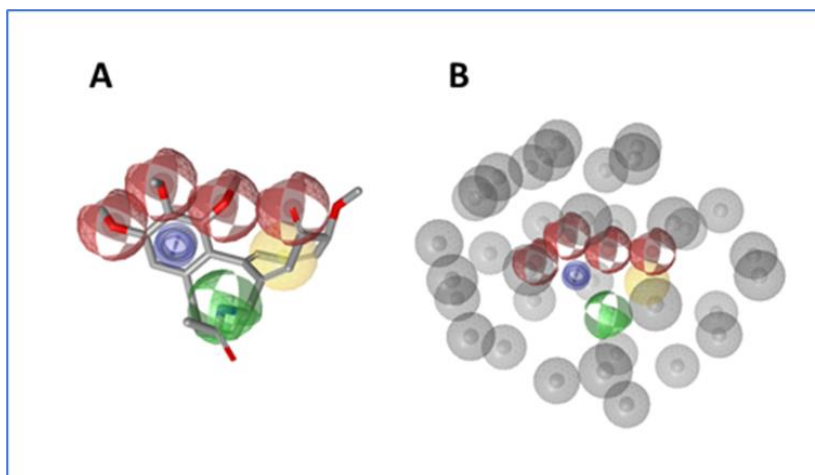

**Figure S7.** A) Optimised LB pharmacophore model LB7 aligned with base ligand **AS30** and B) the model LB7 with Xvols spheres. (HC, yellow spheres), (AI, purple sphere), (HBD; green arrows/spheres), (HBA; red arrows/spheres), and (Xvols; grey sphere).

### Model LB8

Pharmacophore model LB8 was developed by manually selecting and aligning **AS1**, **AS3**, **AS8**, **AS12**, **AS13**, **AS14**, **AS15**, **AS16**, and **AS17** and creating a merged features pharmacophore. After automatic pharmacophore model generation, removal and tolerance adjusting of features and Xvols coat modifications were optimised to find as many actives as possible while excluding inactives. The final model contained one AI feature, two HC features, two HBAs and 30 Xvols.

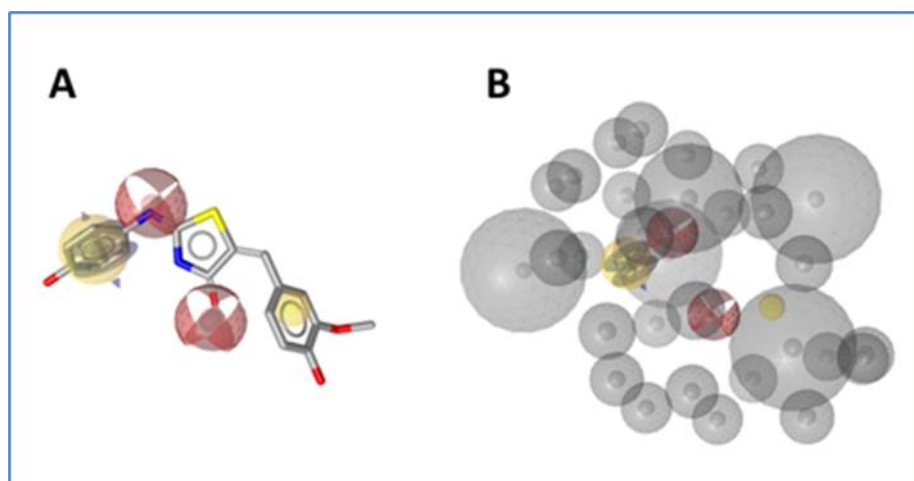

**Figure S8.** A) Optimised LB pharmacophore model LB8 aligned with base ligand **AS15** and B) the model LB8 with Xvol spheres. (HC, yellow spheres), (AI, purple sphere), (HBA; red arrows/spheres), and (Xvols; grey sphere).

### Model LB9

Pharmacophore model LB9 was developed by manually selecting and aligning **AS3**, **AS8**, **AS12**, and **AS13** and creating a merged features pharmacophore. After automatic pharmacophore model generation, removal and tolerance adjusting of features and Xvols coat modifications were optimised to find as many actives as possible while excluding inactives. The final model contained two AI features, one HC feature, three HBAs and 39 Xvols.

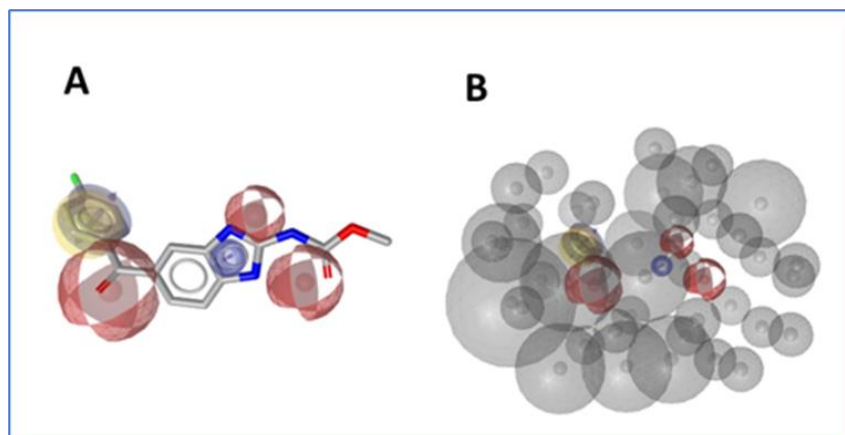

**Figure S9.** A) Optimised LB pharmacophore model LB9 aligned with base ligand **AS8** and B) the model LB9 with Xvols spheres. (HC, yellow spheres), (AI, purple sphere), (HBA; red arrows/spheres), and (Xvols; grey sphere).

### Model LB10

Pharmacophore model LB10 was developed by automatic clustering and aligning **AS79**, **AS80**, **AS81**, and **AS82** creating a merged features pharmacophore. After automatic pharmacophore model generation, removal and tolerance adjusting of features and Xvols coat modifications were optimised to find as many actives as possible while excluding inactive. The final model contained two AI features, two HC features, two HBAs and 45 Xvols.

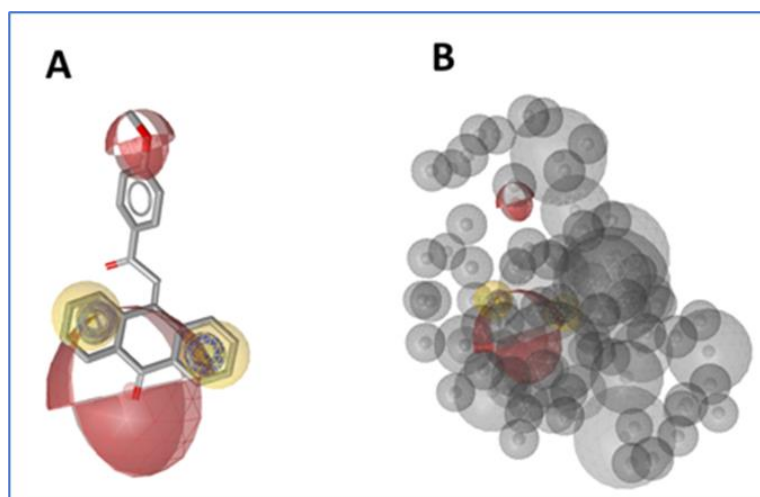

**Figure S10.** A) Optimised LB pharmacophore model LB10 aligned with base ligand **AS80** and B) the model LB10 with Xvol spheres. (HC, yellow spheres), (AI, purple sphere), (HBA; red arrows/spheres), and (Xvols; grey sphere).

### **Model LB11**

Pharmacophore model LB11 was developed by manually selecting and aligning **AS13**, **AS27**, **AS43**, and **AS72** and creating a merged features pharmacophore. After automatic pharmacophore model generation, removal and tolerance adjusting of features and Xvols coat modifications were optimised to find as many actives as possible while excluding inactive. The final model contained one HC feature, four HBAs and 39 Xvols.



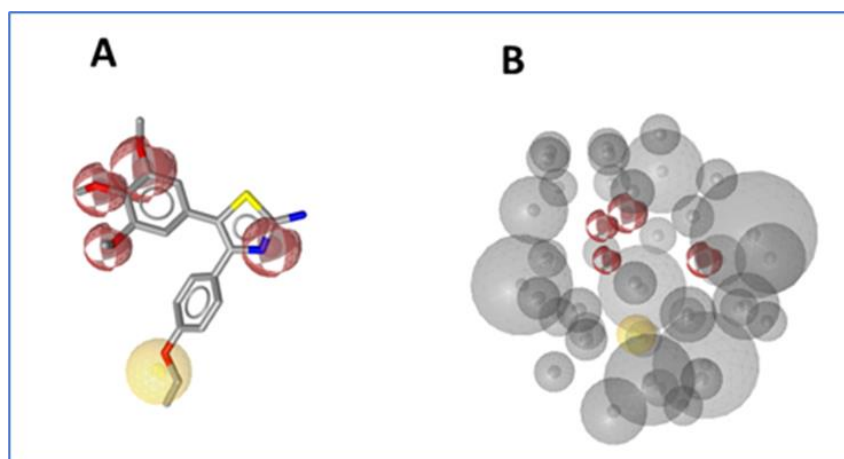

**Figure S11.** A) Optimised LB pharmacophore model LB11 aligned with base ligand **AS13** and B) the model LB11 with Xvol spheres. (HC, yellow spheres), (AI, purple sphere), (HBA; red arrows/spheres), and (Xvols; grey sphere).

### Model DS2

The model DS2 was based on **AS64**, a diphenyl sulfonamide. It contained three HC features, two AI features that are mapped on the two phenyl rings, two HBD features and 26 Xvols.

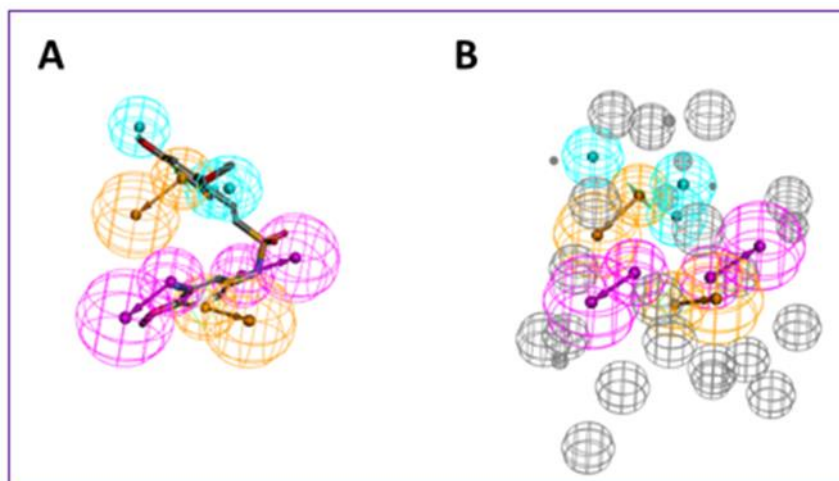

**Figure S12.** A) Optimised LB pharmacophore model DS2 aligned with base ligand **AS64**. B) the model DS2 with Xvol spheres. (HC, blue spheres), (AI, brown spheres), (HBD; purple), and (Xvols; grey sphere).

### Model DS5

Model DS5 was based on **AS75**, a podophyllotoxin. It contains four HC features, two AI features, five HBA features and 34 Xvols.

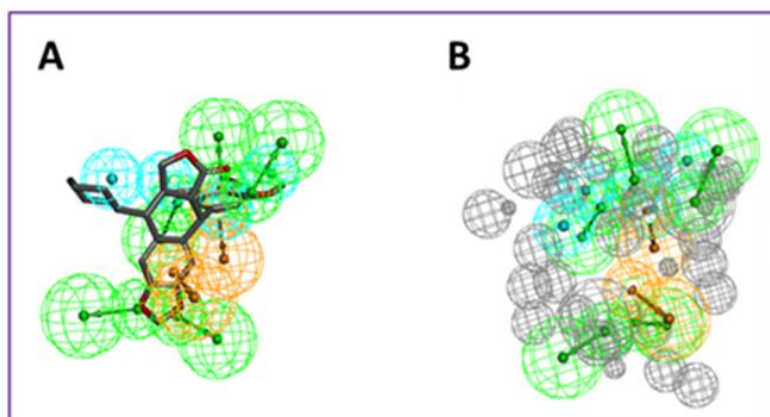

**Figure S13.** A) Optimised LB pharmacophore model DS5 aligned with base ligand **AS75**. B) the model DS5 with Xvol spheres. (HC, blue spheres), (AI, brown spheres), (HBA; green sphere), and exclusion volumes (Xvols; grey sphere).

### Model DS8

The model DS8 was calculated for **AS77**, a modified podophyllotoxin scaffold with an amine functionality inserted in the central ring and an elongated linker to the trimethoxyphenylring.

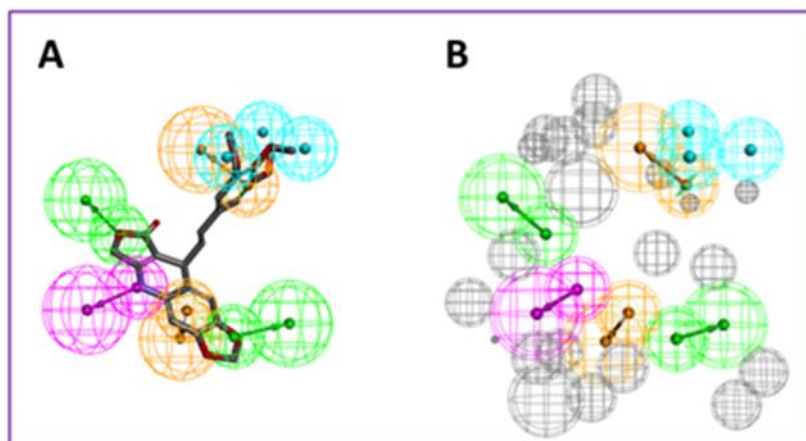

**Figure S14.** A) Optimised LB pharmacophore model DS8 aligned with base ligand **AS77** .B) the model DS8 with Xvol spheres. (HC, blue spheres), (AI, brown spheres), (HBA; green sphere) (HBD; purple sphere), and (Xvols; grey sphere).

### Model DS9

Model DS9 was derived from **AS79**, an anthracene sulfonate. It consists of a HC feature, three AI features, two HBA features and 60 Xvols.

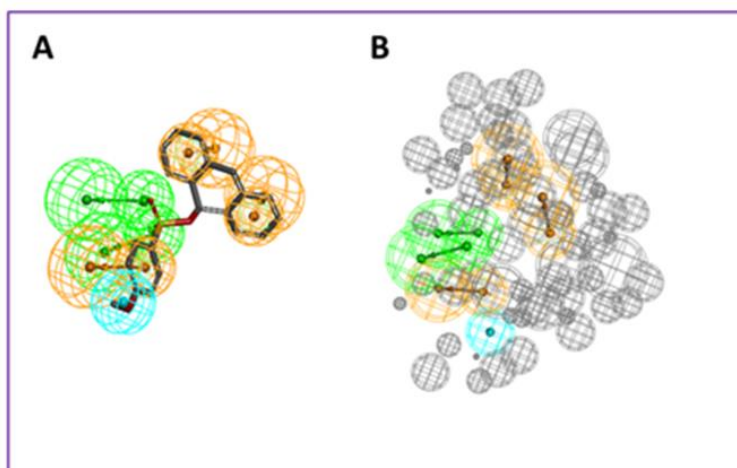

**Figure S15.** A) Optimised LB pharmacophore model DS9 aligned with base ligand **AS79**. B) the model DS9 with Xvol spheres. (HC, blue spheres), (AI, brown spheres), (HBA; green sphere), and (Xvols; grey sphere).

### Model DS12

The model DS12 was based on **AS29**, a chalcone. The final model contains two HC, two AI, two HBA features and 118 Xvols.

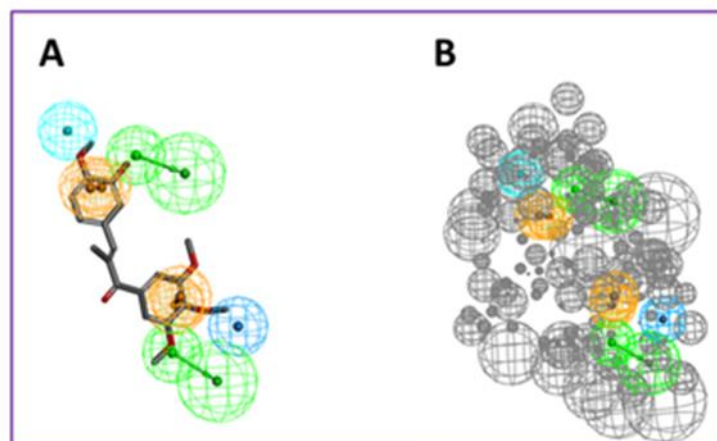

**Figure S16.** A) Optimised LB pharmacophore model DS12 aligned with base ligand **AS29**. B) the model DS12 with Xvol spheres. (HC, blue spheres), (AI, brown spheres), (HBA; green sphere), and (Xvols; grey sphere).

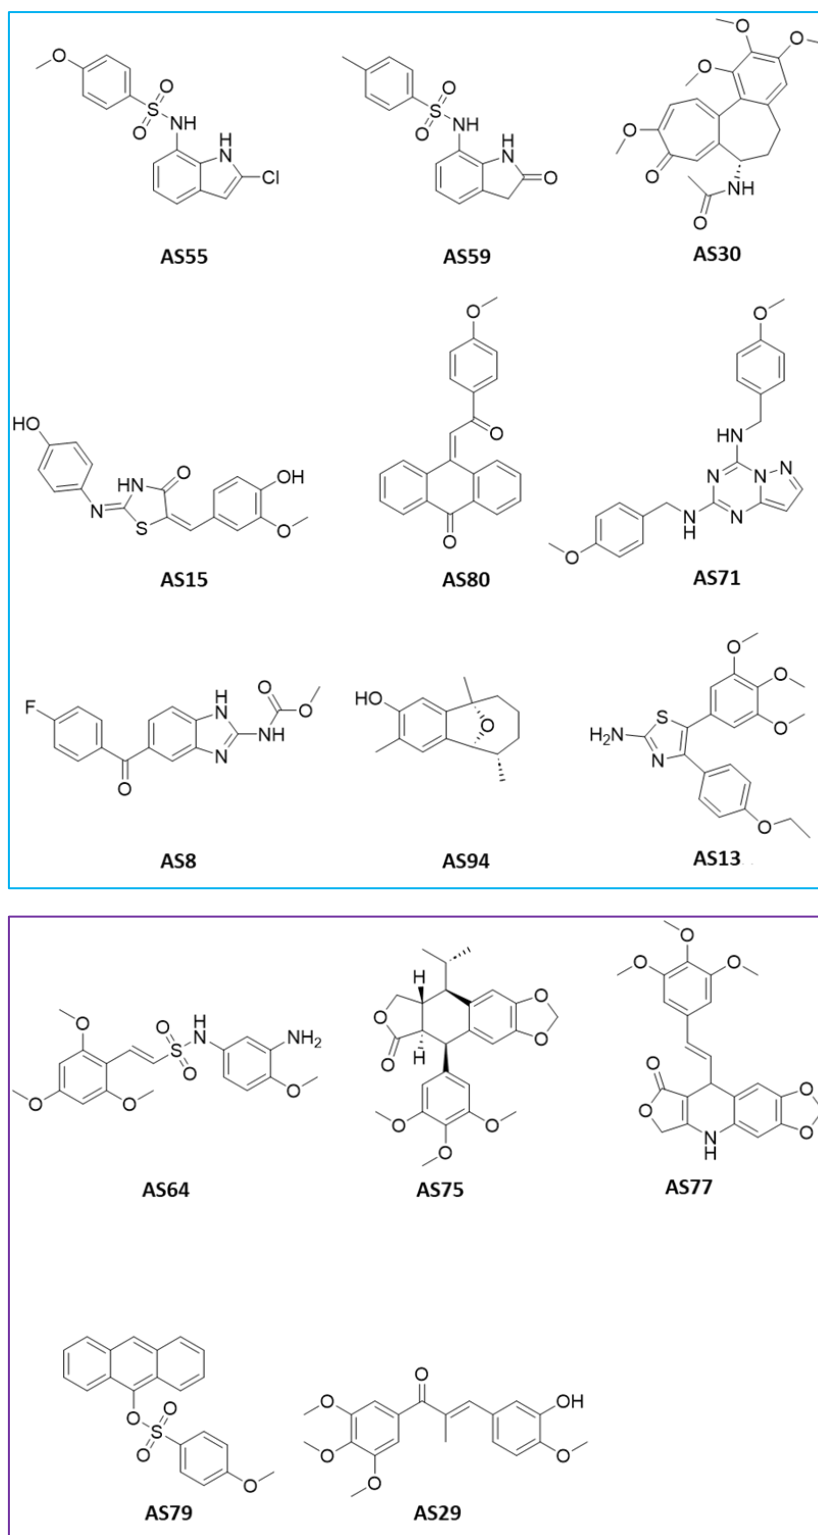

**Figure S17.** Chemical structures of the main active scaffolds used to generate the LB pharmacophore models. Compounds in the blue box were used for the LS models and compounds in the purple box were used for the DS models.

### 3. Virtual screening of pharmacophore models with consensus hits

**Table S2.** Virtual screening results with consensus hits obtained by the respective pharmacophore models.

| Models    | Consensus hit (n=2) |            |                |
|-----------|---------------------|------------|----------------|
|           | Specs (Synth)       | Specs (NP) | PhytoChem (PC) |
| DS2/DS8   | 0                   | 0          | 1              |
| DS5/DS8   | 0                   | 3          | 0              |
| DS8/DS9   | 4                   | 1          | 0              |
| DS5/DS9   | 9                   | 0          | 0              |
| DS2/DS9   | 13                  | 0          | 0              |
| DS12/DS9  | 5                   | 0          | 0              |
| DS12/DS2  | 3                   | 0          | 0              |
| LB8/DS9   | 3                   | 0          | 0              |
| LB8/DS2   | 1                   | 0          | 0              |
| LB8/DS12  | 2                   | 0          | 0              |
| LB7/DS9   | 2                   | 0          | 0              |
| LB6/DS9   | 1                   | 0          | 0              |
| LB5/DS9   | 19                  | 0          | 0              |
| LB5/DS2   | 10                  | 0          | 0              |
| LB5/DS12  | 3                   | 0          | 0              |
| LB5/DS8   | 4                   | 0          | 0              |
| LB5/DS6   | 3                   | 0          | 0              |
| LB3/DS9   | 46                  | 0          | 0              |
| LB3/DS5   | 1                   | 0          | 0              |
| LB3/DS2   | 5                   | 0          | 0              |
| LB3/DS12  | 3                   | 0          | 0              |
| LB3/LB9   | 1                   | 0          | 0              |
| LB3/LB8   | 4                   | 0          | 0              |
| LB3/LB6   | 16                  | 0          | 0              |
| LB3/LB5   | 167                 | 0          | 0              |
| SB2/LB5   | 4                   | 0          | 0              |
| LB11/DS9  | 6                   | 0          | 0              |
| LB11/DS2  | 1                   | 0          | 0              |
| LB11/DS12 | 1                   | 0          | 0              |
| LB11/LB9  | 1                   | 0          | 0              |
| LB11/LB8  | 1                   | 0          | 0              |
| LB11/LB7  | 1                   | 0          | 0              |



|                            |               |            |                |
|----------------------------|---------------|------------|----------------|
| LB11/LB6                   | 6             | 0          | 0              |
| LB11/LB5                   | 5             | 0          | 0              |
| LB11/LB3                   | 6             | 0          | 0              |
| LB11/SB2                   | 3             | 0          | 0              |
| LB10/DS9                   | 6             | 0          | 0              |
| LB10/DS5                   | 5             | 0          | 0              |
| LB10/LB3                   | 2             | 0          | 0              |
| LB10/LB11                  | 3             | 0          | 0              |
| SB1/LB5                    | 4             | 0          | 0              |
| SB1/LB3                    | 1             | 0          | 0              |
| <b>Consensus hit (n=3)</b> |               |            |                |
| Models                     | Specs (Synth) | Specs (NP) | PhytoChem (PC) |
| DS5/DS8/DS9                | 0             | 3          | 0              |
| LB10 / LB5 /DS9            | 1             | 0          | 0              |
| LB10 /<br>DS9/DS12         | 2             | 0          | 0              |
| LB11 /LB6/DS2              | 1             | 0          | 0              |
| LB3/LB5/LB8                | 1             | 0          | 0              |
| LB3/LB5/DS9                | 2             | 0          | 0              |
| LB5/DS2/DS8                | 1             | 0          | 0              |
| DS2/DS5/DS9                | 1             | 0          | 0              |
| LB3/LB5/DS2                | 1             | 0          | 0              |

4. Test compound selection of hits obtained from virtual screening of the databases.

**Table S3.** Virtual screening hits selected for experimental validation. Red box indicates insoluble compounds or fluorescent interference and thus excluded compounds.

| Specs           | Virtual Hit | SB1 | SB2 | LB3 | LB4 | LB5 | LB6 | LB7 | LB8 | LB9 | LB10 | LB11 | DS2 | DS5 | DS8 | DS9 | DS12 |
|-----------------|-------------|-----|-----|-----|-----|-----|-----|-----|-----|-----|------|------|-----|-----|-----|-----|------|
| AA-504/21163091 | SC1         |     |     |     |     |     |     |     |     |     |      |      |     | X   |     |     |      |
| AB-323/13887441 | SC2         |     | X   |     |     |     |     |     |     |     |      |      |     |     |     |     |      |
| AC-776/41252593 | SC3         |     |     |     |     |     |     |     |     |     |      |      |     | X   |     |     |      |
| AF-399/14738025 | SC4         |     |     |     |     |     |     |     | X   |     |      |      |     |     |     |     |      |
| AG-205/13184005 | SC5         |     |     | X   |     |     |     |     |     |     |      |      |     |     |     |     |      |
| AG-205/21054014 | SC6         |     |     |     |     |     |     |     |     |     |      |      |     |     |     | X   |      |
| AG-205/36265044 | SC7         | X   |     |     |     |     |     |     |     |     | X    |      |     |     |     |     |      |
| AG-389/15452424 | SC8         |     |     |     |     |     |     |     |     |     |      |      |     |     |     |     |      |
| AG-401/30827061 | SC9         |     |     |     |     |     |     | X   | X   |     |      |      |     |     |     |     | X    |
| AG-690/09788017 | SC10        |     |     |     |     |     |     |     |     |     | X    |      |     |     |     |     |      |
| AJ-292/21122017 | SC11        |     |     |     |     |     |     |     |     |     |      |      |     | X   |     |     |      |
| AJ-916/12583009 | SC12        |     |     |     |     | X   |     |     | X   |     |      |      |     |     |     |     |      |
| AK-087/42718249 | SC13        |     |     |     |     | X   |     |     |     |     |      |      |     |     |     |     |      |
| AK-087/42718376 | SC14        |     |     |     |     |     |     |     |     |     |      |      |     |     |     | X   |      |
| AK-693/40962733 | SC15        |     |     |     |     | X   |     |     |     |     |      |      |     |     |     |     |      |

|                 |      |   |   |   |   |   |  |   |   |   |   |   |   |   |   |  |   |   |  |
|-----------------|------|---|---|---|---|---|--|---|---|---|---|---|---|---|---|--|---|---|--|
| AK-968/41922685 | SC16 | X |   |   |   |   |  |   |   |   |   |   |   |   |   |  |   |   |  |
| AM-807/13614425 | SC17 | X |   | X |   |   |  |   |   |   |   |   |   |   |   |  |   |   |  |
| AN-329/43211079 | SC18 |   |   |   |   |   |  | X |   |   |   |   |   |   |   |  |   |   |  |
| AN-465/14334022 | SC19 |   |   |   |   |   |  |   | X |   |   |   |   |   |   |  |   |   |  |
| AN-465/41674183 | SC20 |   |   |   |   |   |  | X |   |   |   |   |   |   |   |  |   |   |  |
| AN-648/42098983 | SC21 |   | X |   |   |   |  |   |   |   |   |   |   |   |   |  |   |   |  |
| AN-652/12103469 | SC22 |   |   |   |   |   |  | X |   |   |   |   |   |   |   |  |   |   |  |
| AO-022/43514129 | SC23 |   | X |   |   |   |  |   |   |   |   |   |   |   |   |  |   |   |  |
| AO-313/21215019 | SC24 |   |   |   |   |   |  |   |   |   |   |   | X | X | X |  |   |   |  |
| AO-365/43300818 | SC25 |   |   |   |   |   |  |   |   | X |   |   |   |   |   |  | X | X |  |
| AO-365/43300823 | SC26 |   |   | X | X |   |  |   |   |   |   |   |   |   |   |  |   |   |  |
| AO-365/43300935 | SC27 |   |   |   |   |   |  | X |   |   |   |   |   |   |   |  |   |   |  |
| AO-365/43474517 | SC28 |   |   |   |   |   |  |   |   | X |   |   |   |   |   |  | X |   |  |
| AO-365/43486487 | SC29 |   |   |   |   |   |  |   | X |   |   |   |   |   |   |  |   |   |  |
| AO-476/15509049 | SC30 |   |   |   |   |   |  |   |   | X |   |   |   |   |   |  |   |   |  |
| AP-501/43179291 | SC31 |   |   |   |   |   |  |   |   | X | X |   |   |   |   |  |   |   |  |
| AP-263/40720502 | SC32 |   |   |   |   | X |  |   |   |   |   |   |   |   |   |  |   |   |  |
| AP-123/40765218 | SC33 |   |   |   |   |   |  |   |   |   |   |   | X |   |   |  |   |   |  |
| AP-263/43418357 | SC34 |   |   |   |   | X |  |   |   |   |   | X | X |   |   |  |   |   |  |
| AP-845/42065522 | SC35 |   |   |   |   |   |  |   | X |   |   |   |   |   |   |  |   |   |  |
| AP-853/42655770 | SC36 |   |   |   |   | X |  |   |   |   |   |   |   |   |   |  |   |   |  |
| AP-853/43386817 | SC37 |   |   |   |   | X |  |   |   |   |   |   |   |   |   |  |   |   |  |

|                 |      |   |  |   |  |  |   |   |  |  |   |  |   |  |  |  |  |   |
|-----------------|------|---|--|---|--|--|---|---|--|--|---|--|---|--|--|--|--|---|
| AQ-086/43467809 | SC38 | X |  |   |  |  |   |   |  |  |   |  |   |  |  |  |  |   |
| AT-057/43469212 | SC39 |   |  |   |  |  |   |   |  |  |   |  |   |  |  |  |  |   |
| AT-057/43485534 | SC40 |   |  |   |  |  | X |   |  |  |   |  |   |  |  |  |  |   |
| AT-583/41299652 | SC41 |   |  |   |  |  |   |   |  |  |   |  | X |  |  |  |  |   |
| AH-487/41949628 | SC42 |   |  |   |  |  |   |   |  |  |   |  |   |  |  |  |  | X |
| AG-690/12094002 | SC43 |   |  | X |  |  |   | X |  |  |   |  |   |  |  |  |  |   |
| AI-204/31688027 | SC44 |   |  |   |  |  | X |   |  |  |   |  |   |  |  |  |  |   |
| AG-690/12413358 | SC45 | X |  | X |  |  |   |   |  |  |   |  |   |  |  |  |  |   |
| AI-899/21033027 | SC46 |   |  |   |  |  |   |   |  |  | X |  |   |  |  |  |  |   |

## 5. Bioactivity results of selected test compounds from the polymerisation inhibition assay and similarity prediction

**Table S4.** Overview of the tubulin polymerisation inhibition screening results.

| Specs ID-number | ID   | % Inhibition (30 $\mu$ M) $\pm$ SD | % Inhibition (10 $\mu$ M) $\pm$ SD<br>*20 $\mu$ M | IC50 ( $\mu$ M) |
|-----------------|------|------------------------------------|---------------------------------------------------|-----------------|
| AA-504/21163091 | SC1  | 28.8 $\pm$ 22.7                    | n.d                                               | n.d             |
| AB-323/13887441 | SC2  | $\leq$ 0                           | n.d                                               | n.d             |
| AC-776/41252593 | SC3  | Insoluble                          | $\leq$ 0                                          | n.d             |
| AF-399/14738025 | SC4  | 7.0 $\pm$ 8.1                      | n.d                                               | n.d             |
| AG-205/13184005 | SC5  | $\leq$ 0                           | n.d                                               | n.d             |
| AG-205/21054014 | SC6  | 38.4 $\pm$ 12.6                    | n.d                                               | n.d             |
| AG-205/36265044 | SC7  | insoluble                          | insoluble                                         | n.d             |
| AG-389/15452424 | SC8  | Insoluble                          | $\leq$ 0                                          | n.d             |
| AG-401/30827061 | SC9  | Insoluble                          | Insoluble                                         | n.d             |
| AG-690/09788017 | SC10 | Insoluble                          | Insoluble                                         | n.d             |
| AJ-292/21122017 | SC11 | $\leq$ 0                           | n.d                                               | n.d             |
| AJ-916/12583009 | SC12 | insoluble                          | insoluble                                         | n.d             |
| AK-087/42718249 | SC13 | $\leq$ 0                           | n.d                                               | n.d             |
| AK-087/42718376 | SC14 | insoluble                          | 43.9 $\pm$ 23.9                                   | n.d             |
| AK-693/40962733 | SC15 | n.d                                | $\leq$ 0                                          | n.d             |
| AK-968/41922685 | SC16 | n.d                                | $\leq$ 0                                          | n.d             |
| AM-807/13614425 | SC17 | n.d                                | 1.7 $\pm$ 3.1                                     | n.d             |
| AN-329/43211079 | SC18 | n.d                                | n.d                                               | n.d             |
| AN-465/14334022 | SC19 | n.d                                | $\leq$ 0                                          | n.d             |
| AN-465/41674183 | SC20 | 19.2 $\pm$ 24.9                    | n.d                                               | n.d             |
| AN-648/42098983 | SC21 | n.d                                | 1.29 $\pm$ 1.28                                   | n.d             |
| AN-652/12103469 | SC22 | 54.7 $\pm$ 2.5                     | n.d                                               | n.d             |
| AO-022/43514129 | SC23 | 99.3 $\pm$ 3.72                    | 86.5 $\pm$ 2.7                                    | Yes             |
| AO-313/21215019 | SC24 | insoluble                          | *95.50 $\pm$ 2.5                                  | n.d             |
| AO-365/43300818 | SC25 | 25.5 $\pm$ 14.6                    | n.d                                               | n.d             |
| AO-365/43300823 | SC26 | insoluble                          | 37.6 $\pm$ 35.9                                   | n.d             |
| AO-365/43300935 | SC27 | 32.87 $\pm$ 1.69                   | 36.0 $\pm$ 4.4                                    | n.d             |
| AO-365/43474517 | SC28 | Insoluble                          | 2.33 $\pm$ 1.8                                    | n.d             |
| AO-365/43486487 | SC29 | 8.69 $\pm$ 4.42                    | n.d                                               | n.d             |
| AO-476/15509049 | SC30 | Insoluble                          | Insoluble                                         | n.d             |
| AP-501/43179291 | SC31 | Insoluble                          | $\leq$ 0                                          | n.d             |
| AP-263/40720502 | SC32 | 73.9 $\pm$ 0.2                     | n.d                                               | n.d             |
| AP-123/40765218 | SC33 | $\leq$ 0                           | n.d                                               | n.d             |

|                 |            |             |            |     |
|-----------------|------------|-------------|------------|-----|
| AP-263/43418357 | SC34       | 37.8 ± 5.7  | n.d        | n.d |
| AP-845/42065522 | SC35       | Insoluble   | 7.6 ± 8.0  | n.d |
| AP-853/42655770 | SC36       | Insoluble   | ≤ 0        | n.d |
| AP-853/43386817 | SC37       | 100.3 ± 0.4 | 71.3 ± 6.4 | Yes |
| AQ-086/43467809 | SC38       | Insoluble   | 6.7 ± 1.0  | n.d |
| AT-057/43469212 | SC39       | Insoluble   | ≤ 0        | n.d |
| AT-057/43485534 | SC40       | Insoluble   | 3.9 ± 7.3  | n.d |
| AT-583/41299652 | SC41       | ≤ 0         | n.d        | n.d |
| AH-487/41949628 | SC42       | ≤ 0         | n.d        | n.d |
| AG-690/12094002 | SC43       | Insoluble   | 11.3 ± 3.5 | n.d |
| AI-204/31688027 | SC44       | 8.84 ± 1.45 | n.d        | n.d |
| AG-690/12413358 | SC45       | Insoluble   | 17.7 ± 1.0 | n.d |
| AI-899/21033027 | SC46       | 8.3 ± 2.4   | n.d        | n.d |
| MERCK Group     | Hit47      | ≤ 0         | n.d        | n.d |
| TCI Chemicals   | Colchicine | 98.8 ± 5.2  | 83.2 ± 1.7 | YES |

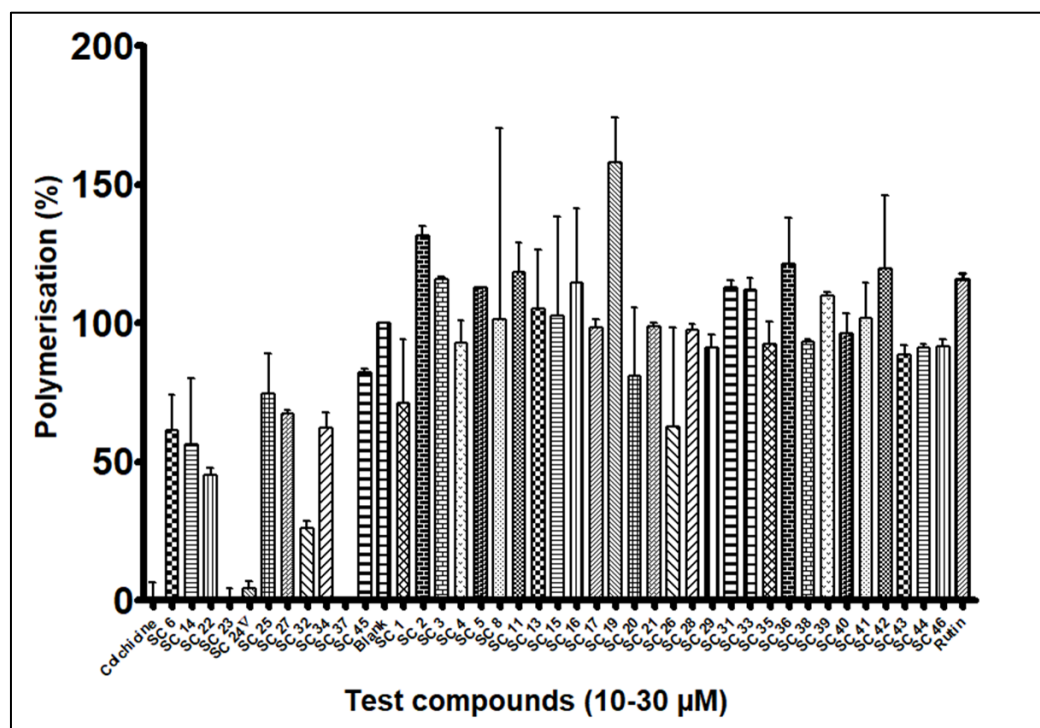

**Figure S18.** Graphical results of the active/inactive preliminary screening. Corresponding numerical values are shown above in Table S4.

**Table S5.** SwissTarget Similarity prediction scores for the tubulin inhibitors

| Inhibitor | Tubulin-Ligand Probability Score | Best Target Probability score              | CHEMBL Target ID |
|-----------|----------------------------------|--------------------------------------------|------------------|
| SC6       | none                             | Carbonic anhydrase II (0.04)               | CHEMBL205        |
| SC14      | CHEMBL195840 (0.62)              | -                                          | CHEMBL1915       |
| SC22      | none                             | Phosphodiesterase 5A (0.11)                | CHEMBL1827       |
| SC23      | none                             | Acetyl-CoA carboxylase 2 (0.11)            | CHEMBL4829       |
| SC24      | CHEMBL363063 (0.90)              | -                                          | CHEMBL1915       |
| SC25      | none                             | NAD-dependent deacetylase sirtuin 1 (0.14) | CHEMBL4506       |
| SC27      | none                             | NAD-dependent deacetylase sirtuin 1 (0.21) | CHEMBL4506       |
| SC32      | none                             | Metabotropic glutamate receptor 5 (0.11)   | CHEMBL3227       |
| SC34      | none                             | Microtubule-associated protein tau (0.79)  | CHEMBL1293224    |
| SC37      | none                             | Monoamine oxidase B (0.11)                 | CHEMBL2039       |
| SC45      | none                             | Histone deacetylase 1 (0.12)               | CHEMBL325        |

## 6. Active compound characterization provided by Specs

**Table S6.** List of compound characterization data for the found active inhibitors provided by SPECS.

| ID   | Specs ID        | QC Method   | Purity | MW     | SMILES                                                                                                     |
|------|-----------------|-------------|--------|--------|------------------------------------------------------------------------------------------------------------|
| SC6* | AG-205/21054014 | LC-MS       | >95%   | 730.7  | <chem>CC1=CC(=O)Oc2cc(ccc12)OC6OC(COS(O)(=O)=O)C(OC(=O)c3ccccc3)C(OC(=O)c4ccccc4)C6(OC(=O)c5ccccc5)</chem> |
| SC14 | AK-087/42718376 | H-NMR,LC-MS | >95%   | 346.38 | <chem>Oc3ccc(C(=O)C=Cc2ccccc2(OCc1ccccc1))c(O)c3</chem>                                                    |

|      |                 |              |      |        |                                                                                  |
|------|-----------------|--------------|------|--------|----------------------------------------------------------------------------------|
| SC22 | AN-652/12103469 | H-NMR, LC-MS | 95%  | 401.46 | <chem>CCOC(=O)c2cccc2(NC(=O)c1cc(OCC)c(OCC)c(c1)OCC)</chem>                      |
| SC23 | AO-022/43514129 | LC-MS        | >95% | 445.4  | <chem>O=C(CC1NC(=O)c2cccc2(NC1(=O)))NCCn3c4cccc4(nc3C(F)(F)F)</chem>             |
| SC24 | AO-313/21215019 | H-NMR, LC-MS | 95%  | 551.98 | <chem>COc1cc(cc(OC)c1(OC))C5c2cc6OCOc6(cc2C(NC(=O)c3cccc3Cl)C4COC(=O)C45)</chem> |
| SC25 | AO-365/43300818 | LC-MS        | >95% | 328.35 | <chem>COc1ccc(cc1)OCC3=Nn2c(nnc2S3)c4ccco4</chem>                                |
| SC27 | AO-365/43300935 | H-NMR, LC-MS | 95%  | 298.33 | <chem>COc1ccccc1C3=Nn2c(nnc2S3)c4ccco4</chem>                                    |
| SC32 | AP-263/40720502 | LC-MS        | >95% | 449.12 | <chem>CC(=O)Nc2cccc2(OS(=O)(=O)c1cc(ccc1Br)Br)</chem>                            |
| SC34 | AP-263/43418357 | LC-MS        | >95% | 348.2  | <chem>COc1c(ccc(c1Cl)Cl)S(=O)(=O)Nc2cccc(O)c2</chem>                             |
| SC37 | AP-853/43386817 | H-NMR, LC-MS | 95%  | 389.82 | <chem>O=C(CSc1nnc(o1)c2cccc(c2)Cl)Nc3ccc4OCOc4(c3)</chem>                        |
| SC45 | AG-690/12413358 | H-NMR, LC-MS | >95% | 525.4  | <chem>COc1ccc(cc1)NC(=O)c2ccc(cc2)Nc4nc3ccc(cc3c(n4)c5ccccc5)Br</chem>           |

\* Stereochemistry undefined

## 7. LC-MS and <sup>1</sup>H-NMR data provided by Specs

Compound **SC6**, LC-MS:



Printed: Thu Nov 29 09:26:51 2001

## Sample Report (continued):

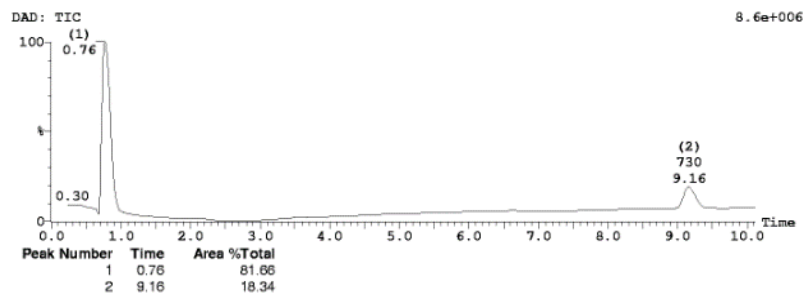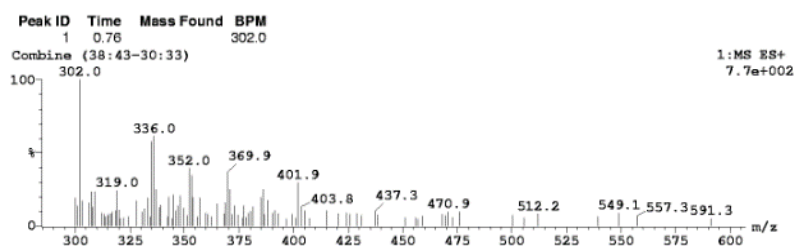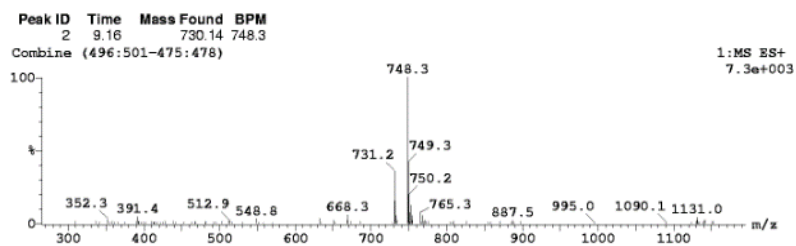Compound SC6, <sup>1</sup>H-NMR:

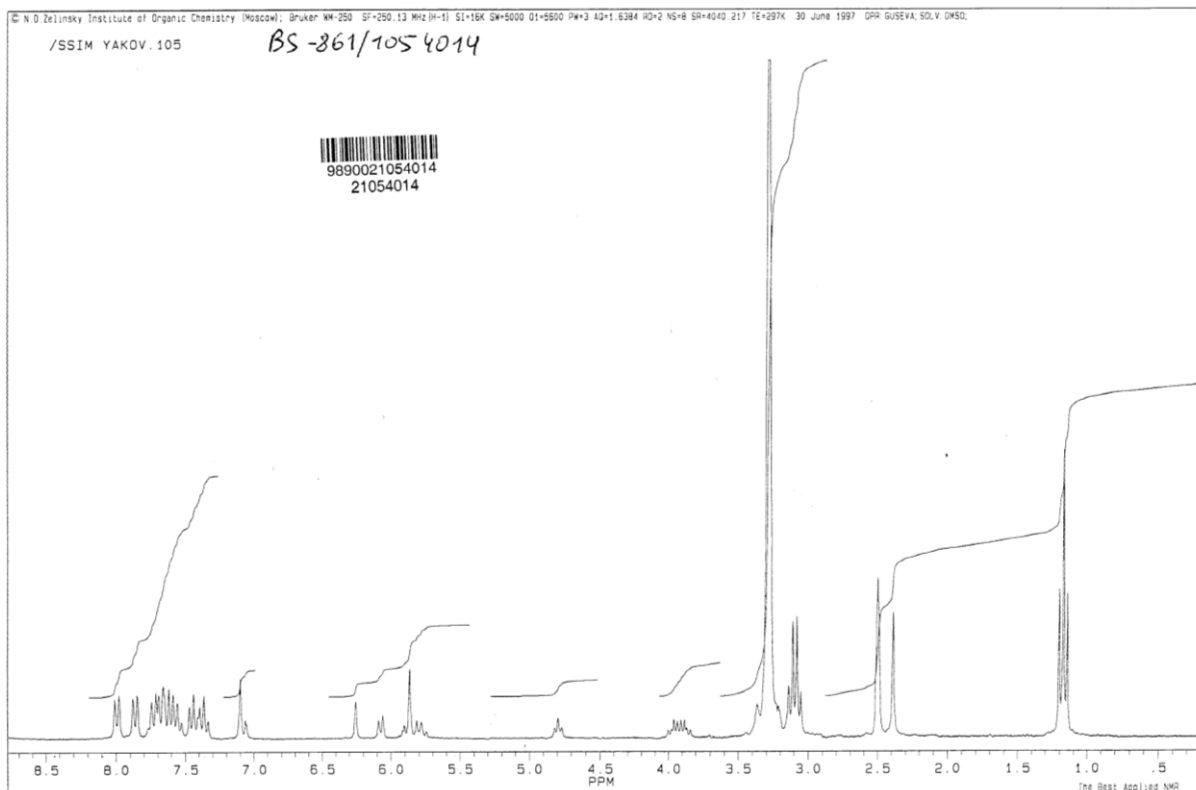

Compound **SC14**, LC-MS:

Printed: Thu Feb 26 16:06:21 2004

Sample Report (continued):

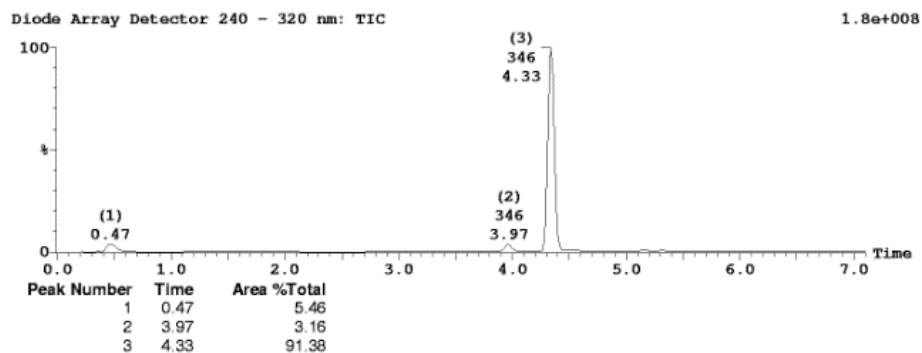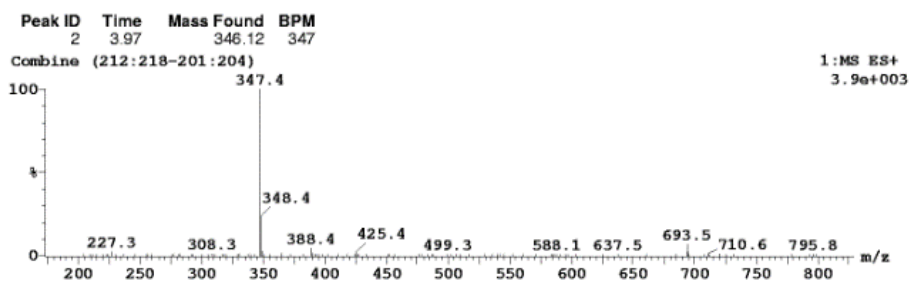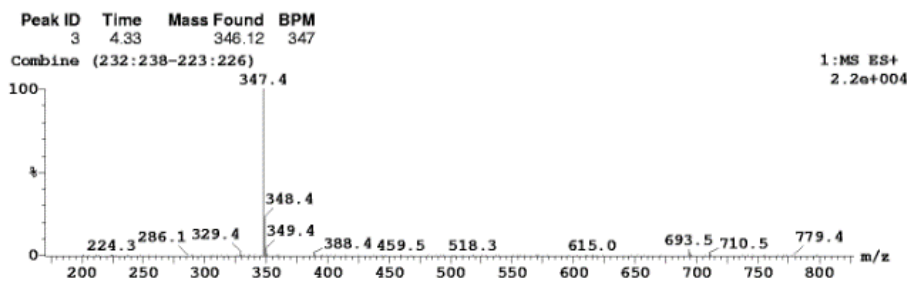

Compound SC14, <sup>1</sup>H-NMR:

Specs

Date: Thu Apr 1, 2004

7900142718376  
STANDARD 1H OBSERVE  
SPECS and BioSPECS  
Pulse Sequence: #2pul  
Solvent: dmsc  
Ambient temperature  
Sample #59  
File: 790014271837601  
Mercury-400BB "nurdelft"  
PULSE SEQUENCE  
Relax. delay 5.000 sec  
Pulse 60.0 degrees  
Acq. time 1.999 sec  
Width 6398.0 Hz  
32 repetitions  
OBSERVE H1, 399.9896647 MHz  
DATA PROCESSING  
Line broadening 0.1 Hz  
FT size 65536  
Total time 3 min, 57 sec

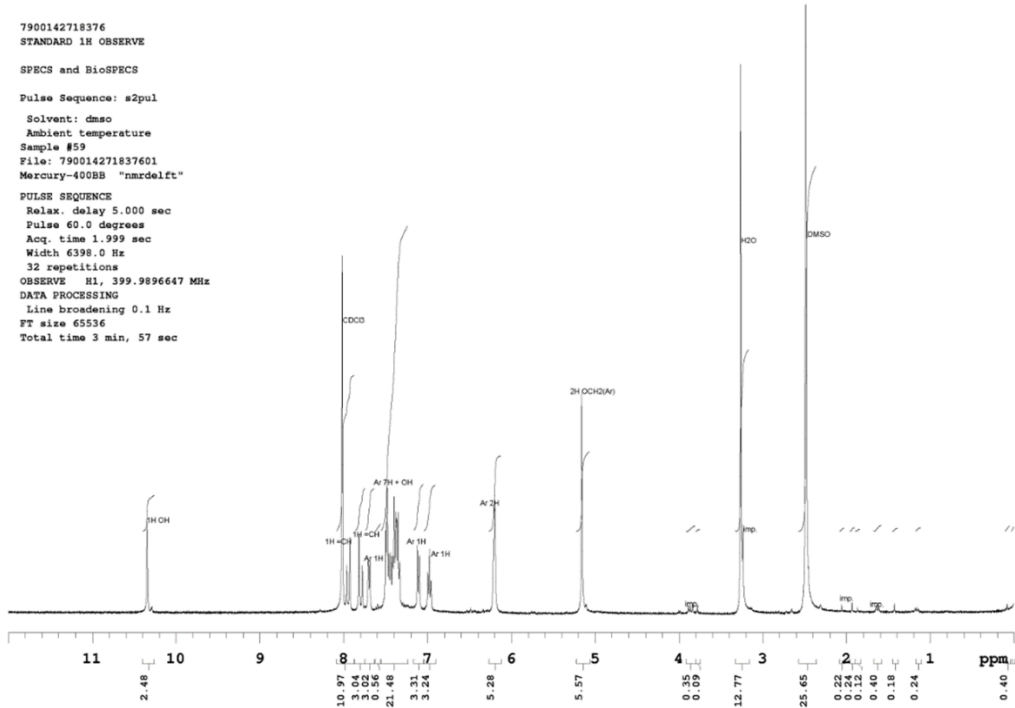

Varian NMR Spectrometer Mercury 400 MHz  
Specs, Delftechpark 30, 2628 XH, Delft, The Netherlands, Tel:+31152518111, Fax:+31702518181, Internet:www.specs.net

Compound **SC22**, LC-MS:

2: UV Detector: TIC

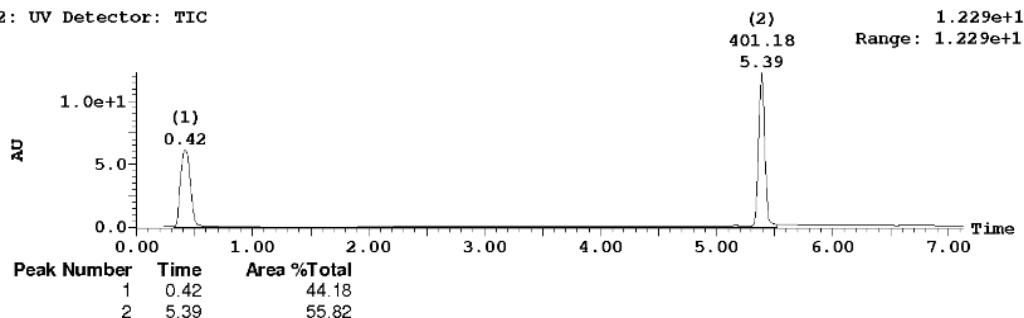

| Peak ID | Time | Mass Found | BPM    |
|---------|------|------------|--------|
| 1       | 0.42 |            | 223.25 |

Combine (18:25-9:13)

1:MS ES+  
3.5e+004

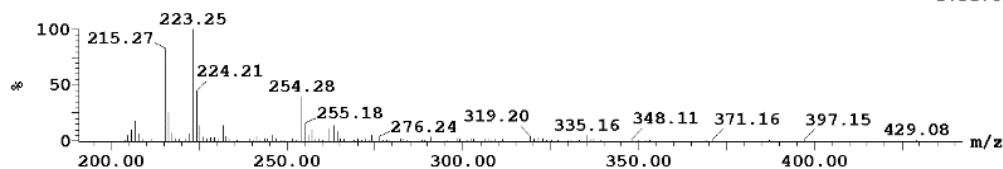

| Peak ID | Time | Mass Found | BPM    |
|---------|------|------------|--------|
| 2       | 5.39 | 401.18     | 402.36 |

Combine (289:296-281:285)

1:MS ES+  
1.2e+005

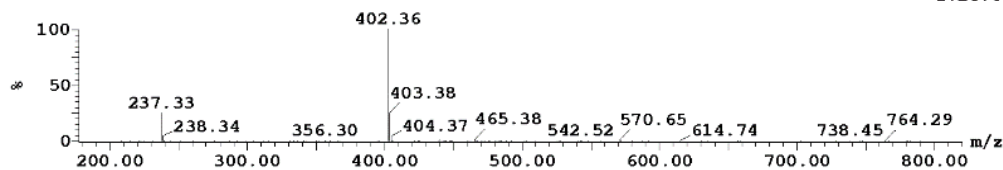

Compound **SC22**, <sup>1</sup>H-NMR:

AN-652/12103469

GA148

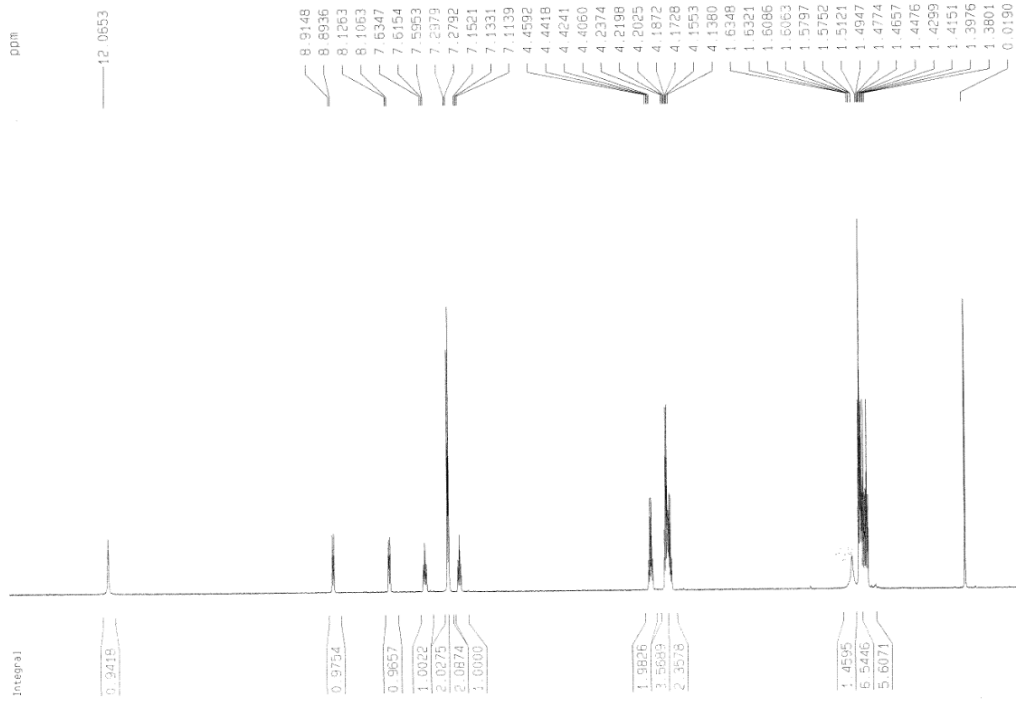

Current Data Parameters  
 NAME hou-1H  
 EXPNO 1  
 PROCNO 1

F2 - Acquisition Parameters  
 Date\_ 20060529  
 Time 19.55  
 INSTRUM AV400  
 PROBHD 5 mm BBO BB-1H  
 PULPROG zg30  
 TD 32768  
 SOLVENT CDCl3  
 NS 8  
 DS 0  
 SWH 7183.906 Hz  
 FIDRES 0.219235 Hz  
 AQ 2.2907028 sec  
 RG 1024  
 DW 69.600 usec  
 DE 6.00 usec  
 TE 298.7 K  
 D1 2.0000000 sec  
 MCREST 0.0000000 sec  
 MCWRR 0.01500000 sec

\*\*\*\*\* CHANNEL f1 \*\*\*\*\*  
 NUCl 1H  
 P1 12.10 usec  
 PL1 0.00 dB  
 SFO1 400.1327978 MHz

F2 - Processing parameters  
 SI 32768  
 SF 400.1300014 MHz  
 HDW EM  
 SSB 0  
 LB 0.30 Hz  
 GB 0  
 PC 0.10

1D NMR plot parameters  
 CX 22.00 cm  
 CY 8.00 cm  
 ZP 13.447 ppm  
 F1 5380.54 Hz  
 F2 -0.783 ppm  
 F3 -313.32 Hz  
 GAMMA 0.64682 ppm/cm  
 GZCM 158.81177 Hz/cm

Compound SC23, LC-MS:

3: UV Detector: TIC Smooth (SG, 2x2)

1.237e+2

Range: 1.237e+2

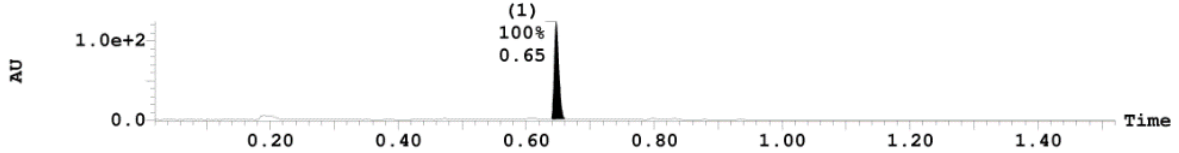

| Peak Number | Compound | Time | AreaAbs | Area %Total | Width | Height | Mass Found     |
|-------------|----------|------|---------|-------------|-------|--------|----------------|
| 1           | Found    | 0.65 | 1e+006  | 100.00      | 0     | 1e+008 | 445.14, 445.14 |

| Peak ID | Time | Mass Found | BPM   |
|---------|------|------------|-------|
| 1       | 0.65 | 446.14     | 46.01 |

| Peak ID | Time | Mass Found | BPM   |
|---------|------|------------|-------|
| 1       | 0.65 | 444.14     | 44.25 |

1: (Time: 0.65)

1:MS ES+ 1: (Time: 0.65)  
9.2e+007

2:MS ES-  
5.3e+004

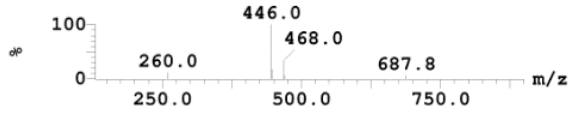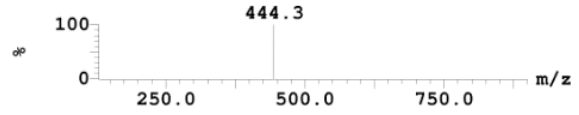

Compound **SC24**, LC-MS:

3: UV Detector: TIC

8.164e+1  
Range: 8.164e+1

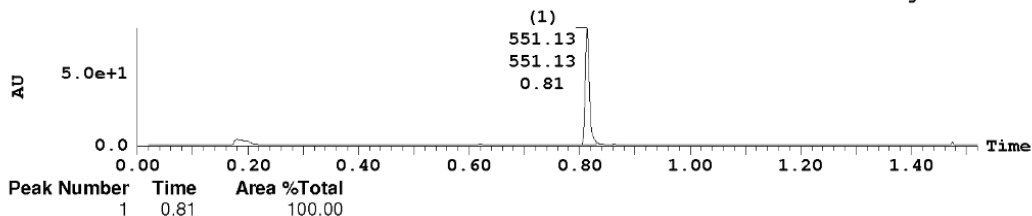

| Peak ID | Time | Mass Found | BPM    |
|---------|------|------------|--------|
| 1       | 0.81 | 551.13     | 552.14 |

1: (Time: 0.81)

1:MS ES+  
1.1e+007

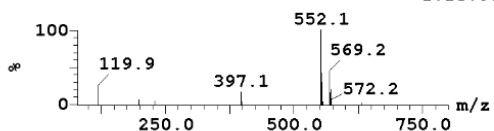

| Peak ID | Time | Mass Found | BPM    |
|---------|------|------------|--------|
| 1       | 0.81 | 551.13     | 550.29 |

1: (Time: 0.81)

2:MS ES-  
6.2e+005

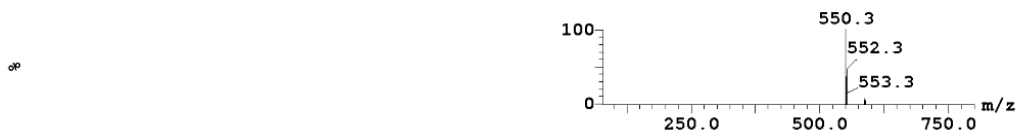

Compound **SC24**, <sup>1</sup>H-NMR:



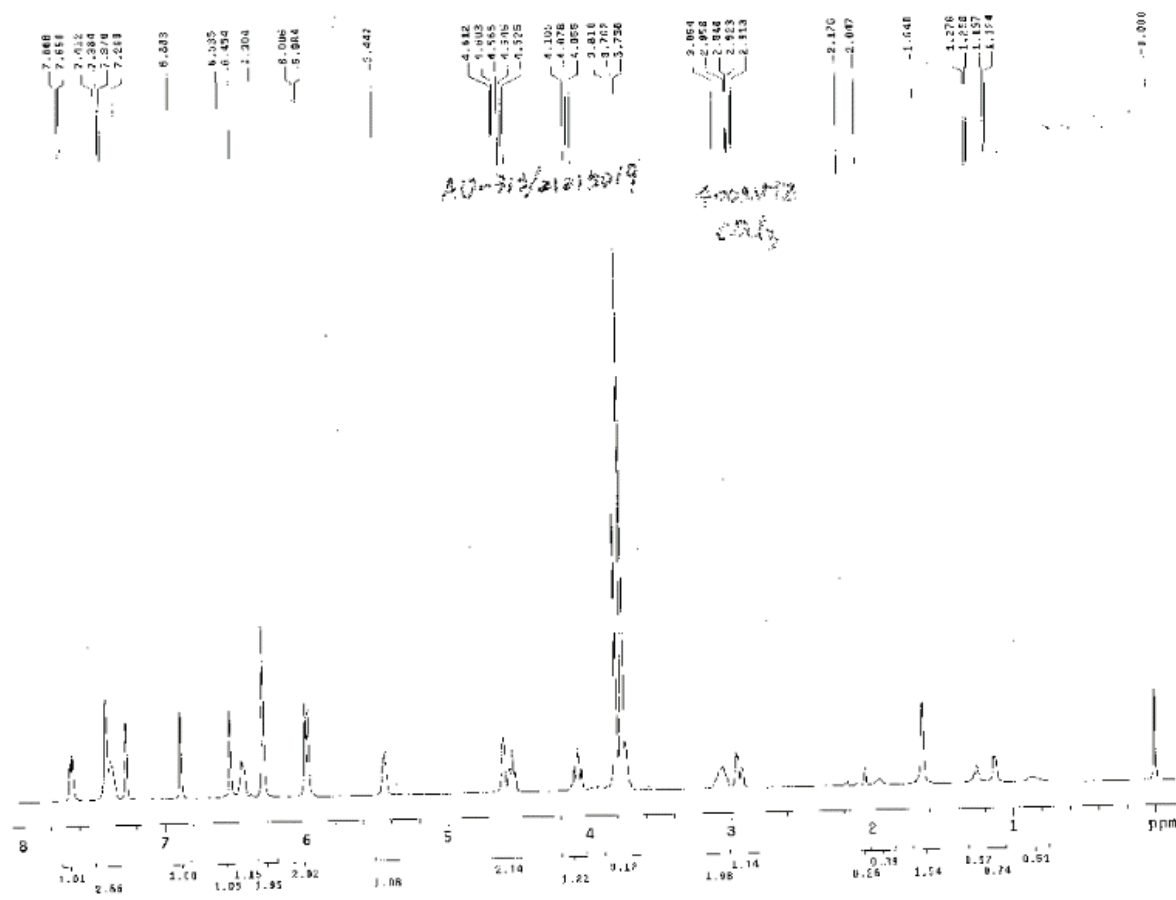

Compound SC25, LC-MS:

2: UV Detector: TIC

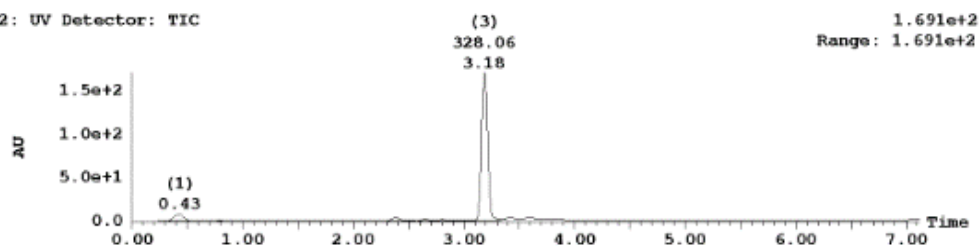

| Peak Number | Time | Area %Total |
|-------------|------|-------------|
| 1           | 0.43 | 5.59        |
| 2           | 2.38 | 2.08        |
| 3           | 3.18 | 92.33       |

| Peak ID | Time | Mass Found | BPM    |
|---------|------|------------|--------|
| 1       | 0.43 |            | 257.20 |

Combine (19:25-10:14)

1:MS ES+  
2.8e+004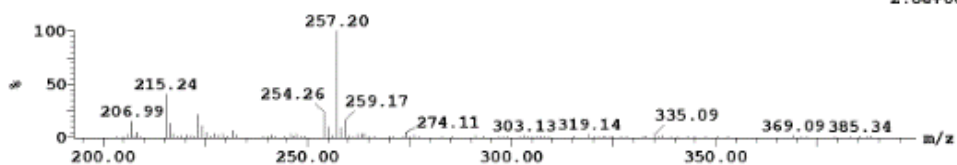

| Peak ID | Time | Mass Found | BPM    |
|---------|------|------------|--------|
| 2       | 2.38 |            | 395.15 |

Combine (125:132-117:121)

1:MS ES+  
1.7e+004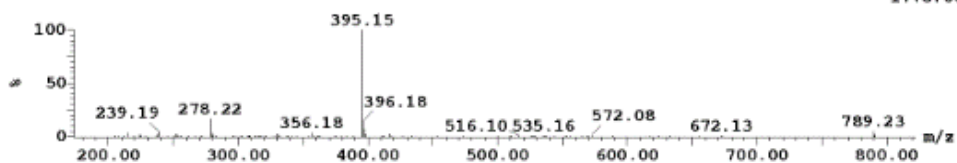

| Peak ID | Time | Mass Found | BPM    |
|---------|------|------------|--------|
| 3       | 3.18 | 328.06     | 329.20 |

Combine (169:175-158:162)

1:MS ES+  
1.3e+006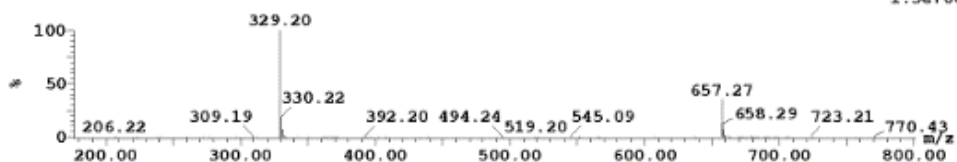Compound **SC27**, LC-MS:

2: UV Detector: TIC

(2)  
298.05  
3.80

1.415e+2  
Range: 1.415e+2

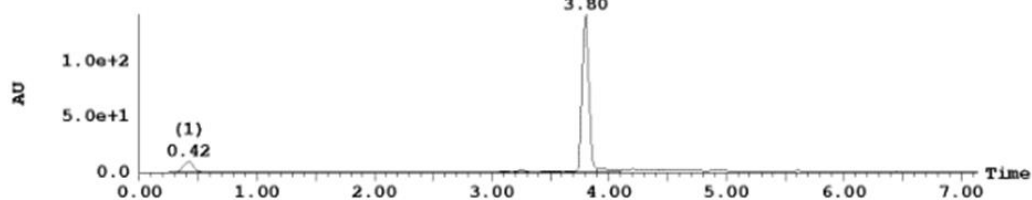

| Peak Number | Time | Area %Total |
|-------------|------|-------------|
| 1           | 0.42 | 7.91        |
| 2           | 3.80 | 89.89       |
| 3           | 3.95 | 2.20        |

Peak ID Time Mass Found BPM

Combine (18:25-9:13)

1:MS ES+  
3.2e+004

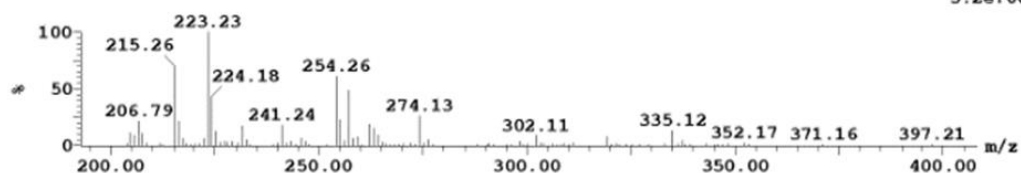

Peak ID Time Mass Found BPM

Combine (203:209-190:194)

1:MS ES+  
1.5e+006

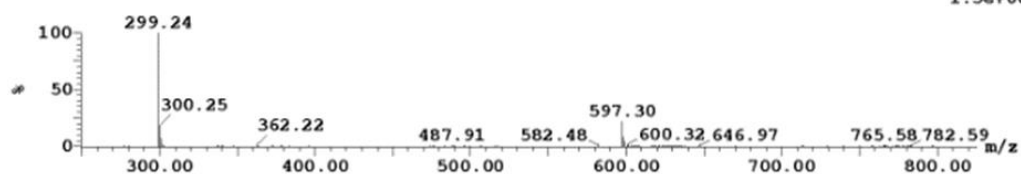

Peak ID Time Mass Found BPM

Combine (211:217-204:209)

1:MS ES+  
1.7e+004

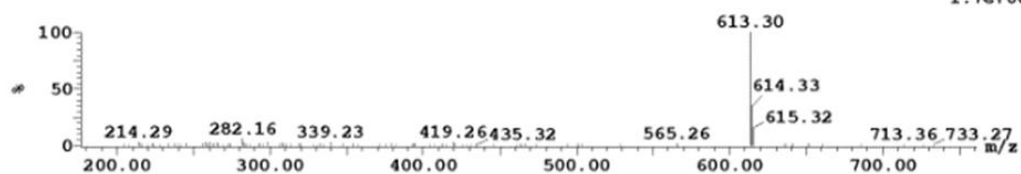

Compound SC27, <sup>1</sup>H-NMR:

B-644  
04-1604

8.22/604

AD-365/43300935

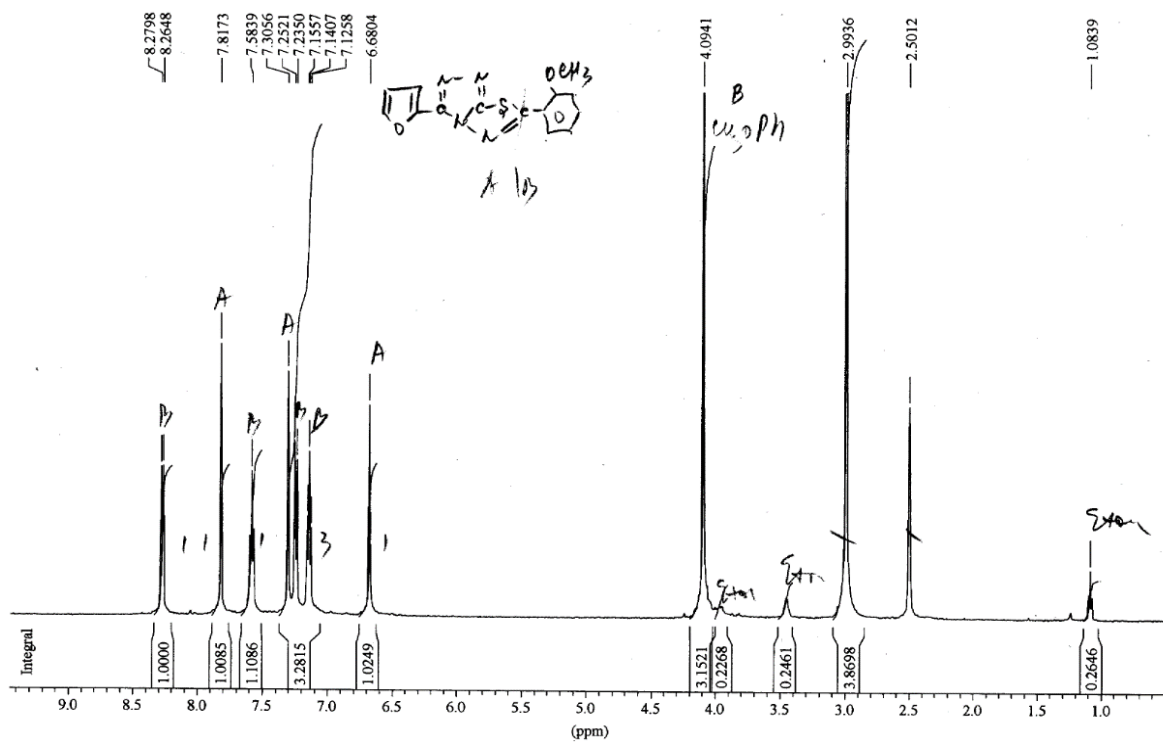

Compound SC32, LC-MS:

3: UV Detector: TIC

4.071e+1  
Range: 4.071e+1

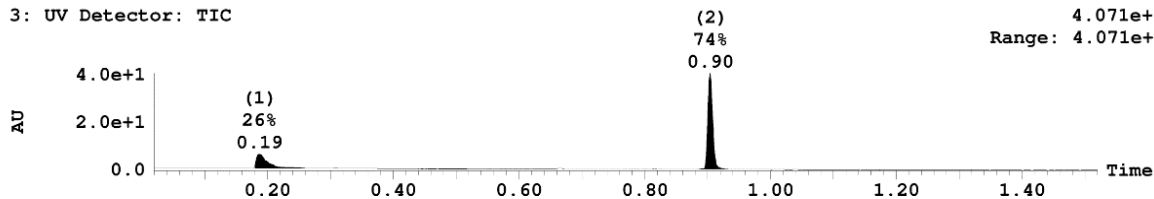

| Peak Number | Compound | Time | AreaAbs | Area%Total | Width | Height | Mass Found |
|-------------|----------|------|---------|------------|-------|--------|------------|
| 1           |          | 0.19 | 1e+005  | 25.93      | 0     | 6e+006 |            |
| 2           | Found    | 0.90 | 4e+005  | 74.07      | 0     | 4e+007 | 446.88     |

Peak ID Time Mass Found BPM

1 0.19 45.86

Peak ID Time Mass Found BPM

2 0.90 447.88 49.76

1:MS ES+  
2.3e+007

1:MS ES+  
2.3e+007

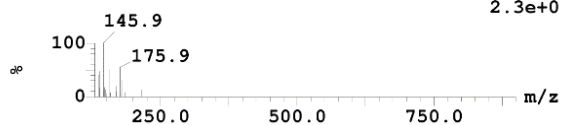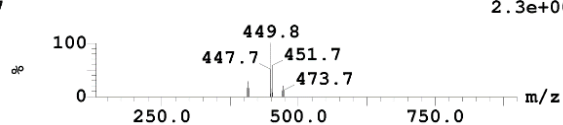

Compound **SC34**, LC-MS:

File:9900143418357  
Vial:5:11,F

ID:AP-263/43418357  
Date:09-Mar-2010

Description:C13H11Cl2NO4S  
Time:04:53:06

3: UV Detector: TIC

1.241e+2  
Range: 1.241e+2

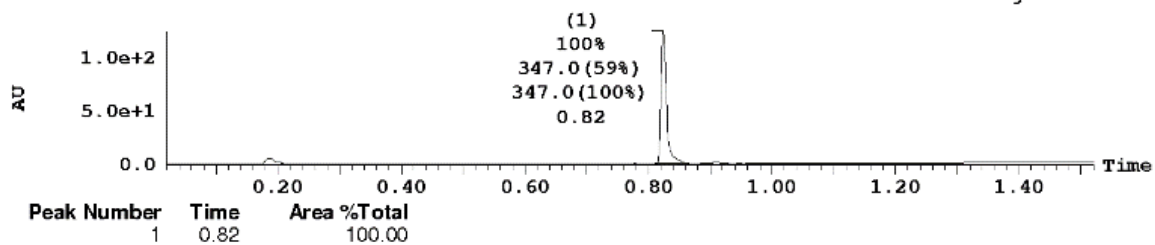

| Peak ID | Time | Mass Found | BPM    | Peak ID | Time | Mass Found | BPM    |
|---------|------|------------|--------|---------|------|------------|--------|
| 1       | 0.82 | 346.98     | 348.27 | 1       | 0.82 | 346.98     | 346.24 |

1: (Time: 0.82) 1:MS ES+ 8.7e+005 1: (Time: 0.82) 2:MS ES- 7.5e+006

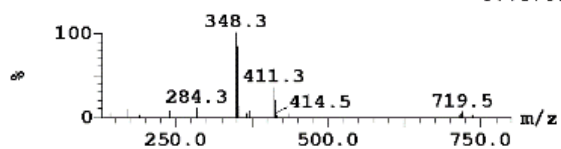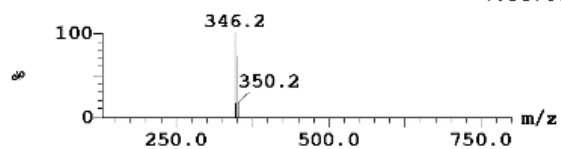

Compound **SC37**, <sup>1</sup>H-NMR:

AP-253/43386817

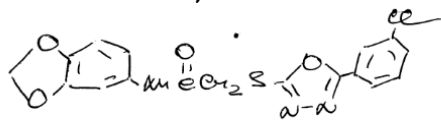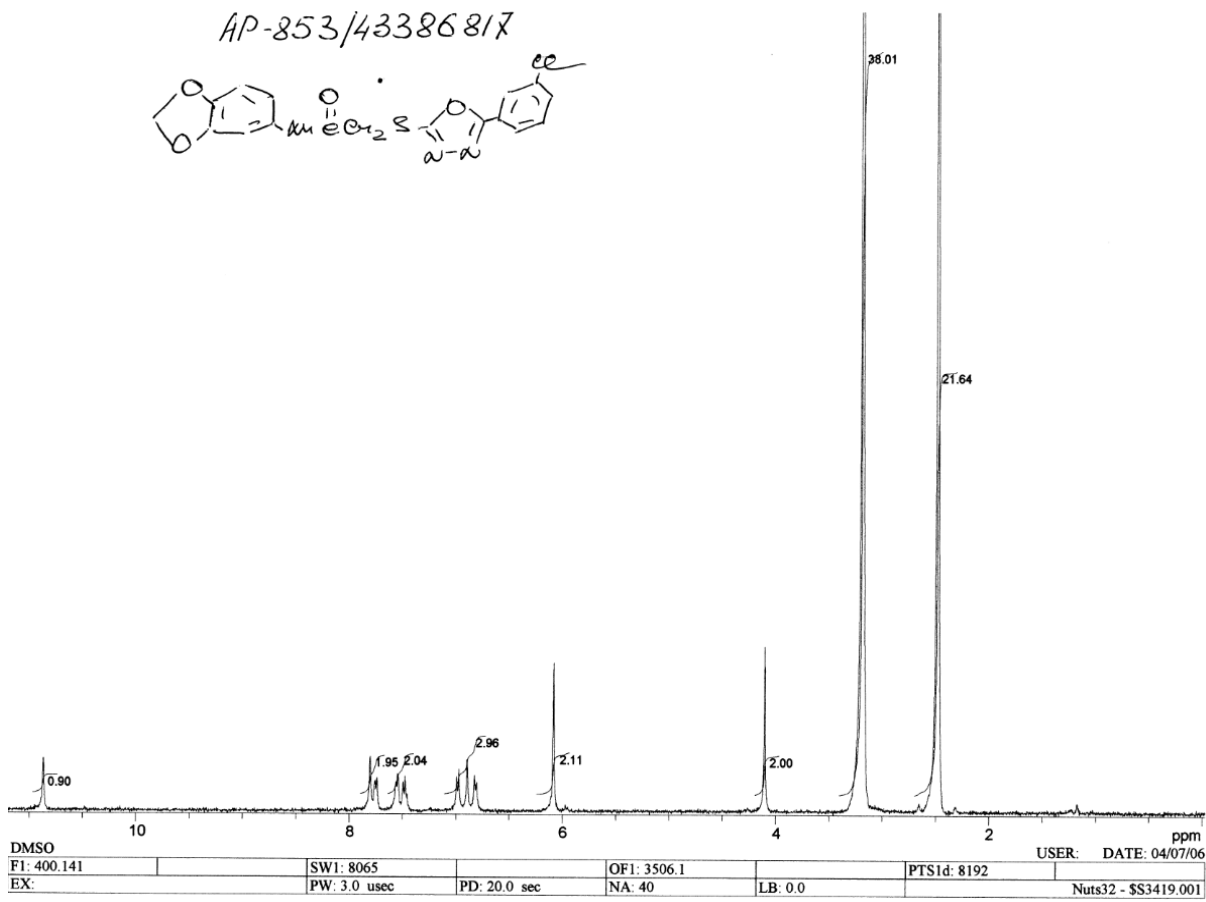

Compound **SC45**, LC-MS:

Specs

File:5000112413358  
Instrument:LC/MS A

ID:AG-690/12413358  
Vial:1:11

Description:C28H21BrN4O2  
Date:13-Apr-2004

Printed: Wed Apr 14 13:04:05 2004

Sample Report (continued):

Diode Array Detector 240 - 320 nm: TIC

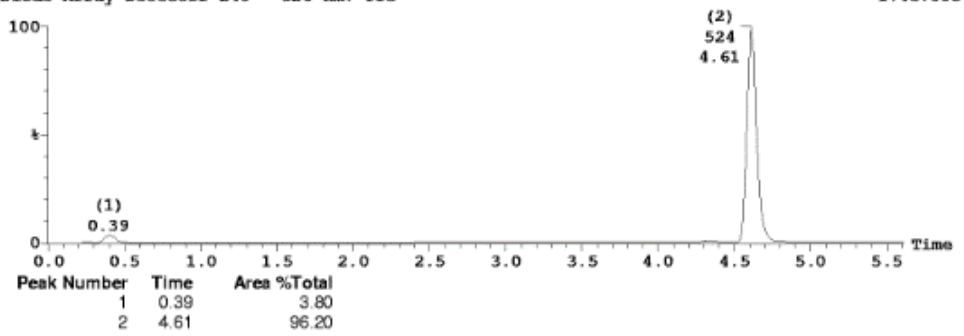

Peak ID Time Mass Found BPM  
1 0.39 215

Combine (17:23-11:14)

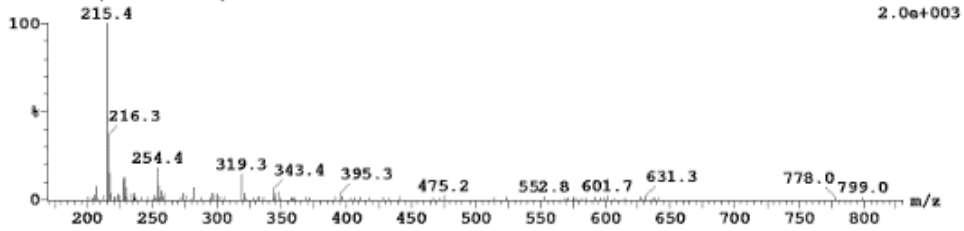

Peak ID Time Mass Found BPM  
2 4.61 524.08 525

Combine (247:253-238:241)

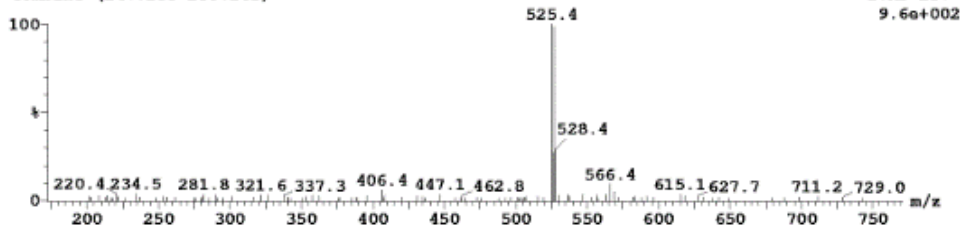



Compound **SC45**,  $^1\text{H-NMR}$ :

A

VLN 2483

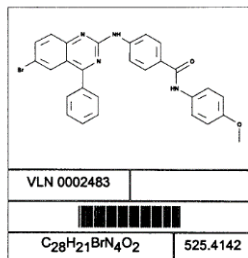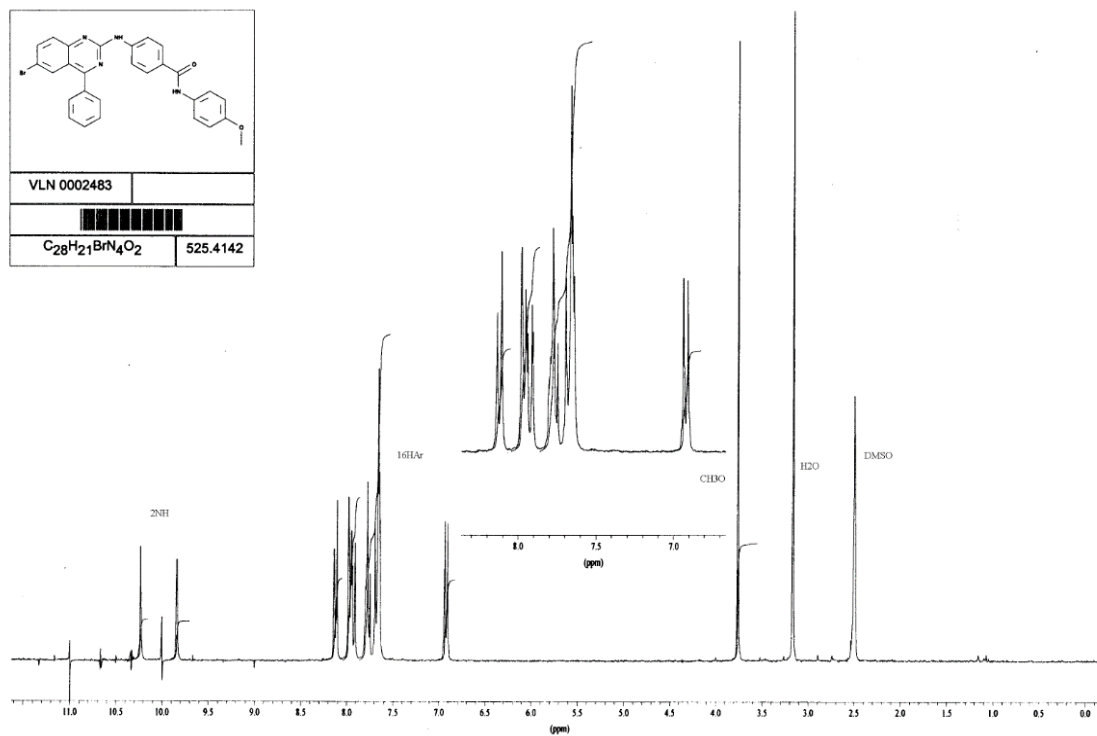

## References

1. Zhou, Y.; Xu, J.; Zhu, Y.; Duan, Y.; Zhou, M. Mechanism of Action of the Benzimidazole Fungicide on *Fusarium graminearum*: Interfering with Polymerization of Monomeric Tubulin But Not Polymerized Microtubule. *Phytopathology*. **2016**, *106*, 807-813. DOI: 10.1094/phyto-08-15-0186-r.
2. Lacey, E.; Brady, R. L.; Prichard, R. K.; Watson, T. R. Comparison of inhibition of polymerisation of mammalian tubulin and helminth ovicidal activity by benzimidazole carbamates. *Vet. Parasitol.* **1987**, *23*, 105-119. DOI: 10.1016/0304-4017(87)90029-X.
3. Morgan, U. M.; Reynoldson, J. A.; Thompson, R. C. Activities of several benzimidazoles and tubulin inhibitors against *Giardia* spp. in vitro. *Antimicrob. Agents Chemother.* **1993**, *37*, 328-31. DOI: 10.1128/aac.37.2.328.
4. Kamal, A.; Bharath Kumar, G.; Lakshma Nayak, V.; Reddy, V. S.; Shaik, A. B.; Rajender; Kashi Reddy, M. Design, synthesis and biological evaluation of imidazopyridine/imidazopyrimidine-benzimidazole conjugates as potential anticancer agents. *MedChemComm.* **2015**, *6*, 606-612. DOI: 10.1039/C4MD00400K.
5. Wu, Y.; Guan, Q.; Zheng, D.; Yan, P.; Feng, D.; Du, J.; Zhang, J.; Zuo, D.; Bao, K.; Zhang, W. Conformation impacts on the bioactivities of SMART analogues. *Eur. J. Med. Chem.* **2018**, *158*, 733-742. DOI: 10.1016/j.ejmech.2018.09.045.
6. Wang, F.; Yang, Z.; Liu, Y.; Ma, L.; Wu, Y.; He, L.; Shao, M.; Yu, K.; Wu, W.; Pu, Y.; Nie, C.; Chen, L. Synthesis and biological evaluation of diarylthiazole derivatives as antimitotic and antivasular agents with potent antitumor activity. *Bioorg. Med. Chem.* **2015**, *23*, 3337-3350. DOI: 10.1016/j.bmc.2015.04.055.

7. Zhang, Q.; Zhai, S.; Li, L.; Li, X.; Zhou, H.; Liu, A.; Su, G.; Mu, Q.; Du, Y.; Yan, B. Anti-tumor selectivity of a novel Tubulin and HSP90 dual-targeting inhibitor in non-small cell lung cancer models. *Biochem. Pharmacol.* **2013**, *86*, 351-360. DOI: 10.1016/j.bcp.2013.05.019.
8. Li, L.; Liu, Y.; Zhang, Q.; Zhou, H.; Zhang, Y.; Yan, B. Comparison of Cancer Cell Survival Triggered by Microtubule Damage after Turning Dyrk1B Kinase On and Off. *ACS Chem. Biol.* **2014**, *9*, 731-742. DOI: 10.1021/cb4005589.
9. Mu, Y.; Liu, Y.; Li, L.; Tian, C.; Zhou, H.; Zhang, Q.; Yan, B. The novel tubulin polymerization inhibitor MHPT exhibits selective anti-tumor activity against rhabdomyosarcoma in vitro and in vivo. *PLoS One.* **2015**, *10*, e0121806. DOI: 10.1371/journal.pone.0121806.
10. Lawrence, N. J.; Rennison, D.; McGown, A. T.; Ducki, S.; Gul, L. A.; Hadfield, J. A.; Khan, N. Linked Parallel Synthesis and MTT Bioassay Screening of Substituted Chalcones. *J. Comb. Chem.* **2001**, *3*, 421-426. DOI: 10.1021/cc000075z.
11. Woods, J. A.; Hadfield, J. A.; Pettit, G. R.; Fox, B. W.; McGown, A. T. The interaction with tubulin of a series of stilbenes based on combretastatin A-4. *Br. J. Cancer.* **1995**, *71*, 705-711. DOI: 10.1038/bjc.1995.138.
12. Qian, Y.; Ma, G.-Y.; Yang, Y.; Cheng, K.; Zheng, Q.-Z.; Mao, W.-J.; Shi, L.; Zhao, J.; Zhu, H.-L. Synthesis, molecular modeling and biological evaluation of dithiocarbamates as novel antitubulin agents. *Bioorg. Med. Chem.* **2010**, *18*, 4310-4316. DOI: 10.1016/j.bmc.2010.04.091.
13. Salum, L. B.; Altei, W. F.; Chiaradia, L. D.; Cordeiro, M. N. S.; Canevarolo, R. R.; Melo, C. P. S.; Winter, E.; Mattei, B.; Daghestani, H. N.; Santos-Silva, M. C.; Creczynski-

Pasa, T. B.; Yunes, R. A.; Yunes, J. A.; Andricopulo, A. D.; Day, B. W.; Nunes, R. J.; Vogt, A. Cytotoxic 3,4,5-trimethoxychalcones as mitotic arresters and cell migration inhibitors. *Eur. J. Med. Chem.* **2013**, *63*, 501-510. DOI: 10.1016/j.ejmech.2013.02.037.

14. Wang, Y.-T.; Qin, Y.-J.; Zhang, Y.-L.; Li, Y.-J.; Rao, B.; Zhang, Y.-Q.; Yang, M.-R.; Jiang, A.-Q.; Qi, J.-L.; Zhu, H.-L. Synthesis, biological evaluation, and molecular docking studies of novel chalcone oxime derivatives as potential tubulin polymerization inhibitors. *RSC Adv.* **2014**, *4*, 32263-32275. DOI: 10.1039/C4RA03803G.

15. Zhu, C.; Zuo, Y.; Wang, R.; Liang, B.; Yue, X.; Wen, G.; Shang, N.; Huang, L.; Chen, Y.; Du, J.; Bu, X. Discovery of Potent Cytotoxic Ortho-Aryl Chalcones as New Scaffold Targeting Tubulin and Mitosis with Affinity-Based Fluorescence. *J. Med. Chem.* **2014**, *57*, 6364-6382. DOI: 10.1021/jm500024v.

16. Chen, J.; Yan, J.; Hu, J.; Pang, Y.; Huang, L.; Li, X. Synthesis, biological evaluation and mechanism study of chalcone analogues as novel anti-cancer agents. *RSC Adv.* **2015**, *5*, 68128-68135. DOI: 10.1039/C5RA14888J.

17. Yan, J.; Chen, J.; Zhang, S.; Hu, J.; Huang, L.; Li, X. Synthesis, Evaluation, and Mechanism Study of Novel Indole-Chalcone Derivatives Exerting Effective Antitumor Activity Through Microtubule Destabilization in Vitro and in Vivo. *J. Med. Chem.* **2016**, *59*, 5264-5283. DOI: 10.1021/acs.jmedchem.6b00021.

18. Ducki, S.; Rennison, D.; Woo, M.; Kendall, A.; Chabert, J. F. D.; McGown, A. T.; Lawrence, N. J. Combretastatin-like chalcones as inhibitors of microtubule polymerization. Part 1: Synthesis and biological evaluation of antivasular activity. *Bioorg. Med. Chem.* **2009**, *17*, 7698-7710. DOI: 10.1016/j.bmc.2009.09.039.

19. Ducki, S.; Mackenzie, G.; Lawrence, N. J.; Snyder, J. P. Quantitative Structure–Activity Relationship (5D-QSAR) Study of Combretastatin-like Analogues as Inhibitors of Tubulin Assembly. *J. Med. Chem.* **2005**, *48*, 457-465. DOI: 10.1021/jm049444m.
20. Thomopoulou, P.; Sachs, J.; Teusch, N.; Mariappan, A.; Gopalakrishnan, J.; Schmalz, H.-G. New Colchicine-Derived Triazoles and Their Influence on Cytotoxicity and Microtubule Morphology. *ACS Med. Chem. Lett.* **2016**, *7*, 188-191. DOI: 10.1021/acsmchemlett.5b00418.
21. Cifuentes, M.; Schilling, B.; Ravindra, R.; Winter, J.; Janik, M. E. Synthesis and biological evaluation of B-ring modified colchicine and isocolchicine analogs. *Bioorg. Med. Chem. Lett.* **2006**, *16*, 2761-2764. DOI: 10.1016/j.bmcl.2006.02.010.
22. Cosentino, L.; Redondo-Horcajo, M.; Zhao, Y.; Santos, A. R.; Chowdury, K. F.; Vinader, V.; Abdallah, Q. M. A.; Abdel-Rahman, H.; Fournier-Dit-Chabert, J.; Shnyder, S. D.; Loadman, P. M.; Fang, W.-s.; Díaz, J. F.; Barasoain, I.; Burns, P. A.; Pors, K. Synthesis and Biological Evaluation of Colchicine B-Ring Analogues Tethered with Halogenated Benzyl Moieties. *J. Med. Chem.* **2012**, *55*, 11062-11066. DOI: 10.1021/jm301151t.
23. Singh, B.; Kumar, A.; Joshi, P.; Guru, S. K.; Kumar, S.; Wani, Z. A.; Mahajan, G.; Hussain, A.; Qazi, A. K.; Kumar, A.; Bharate, S. S.; Gupta, B. D.; Sharma, P. R.; Hamid, A.; Saxena, A. K.; Mondhe, D. M.; Bhushan, S.; Bharate, S. B.; Vishwakarma, R. A. Colchicine derivatives with potent anticancer activity and reduced P-glycoprotein induction liability. *Org. Biomol. Chem.* **2015**, *13*, 5674-5689. DOI: 10.1039/C5OB00406C.
24. Romagnoli, R.; Baraldi, P. G.; Salvador, M. K.; Preti, D.; Aghazadeh Tabrizi, M.; Brancale, A.; Fu, X.-H.; Li, J.; Zhang, S.-Z.; Hamel, E.; Bortolozzi, R.; Basso, G.; Viola, G. Synthesis and Evaluation of 1,5-Disubstituted Tetrazoles as Rigid Analogues of

Combretastatin A-4 with Potent Antiproliferative and Antitumor Activity. *J. Med. Chem.* **2012**, *55*, 475-488. DOI: 10.1021/jm2013979.

25. Flynn, B. L.; Gill, G. S.; Grobelny, D. W.; Chaplin, J. H.; Paul, D.; Leske, A. F.; Lavranos, T. C.; Chalmers, D. K.; Charman, S. A.; Kostewicz, E.; Shackelford, D. M.; Morizzi, J.; Hamel, E.; Jung, M. K.; Kremmidiotis, G. Discovery of 7-Hydroxy-6-methoxy-2-methyl-3-(3,4,5-trimethoxybenzoyl)benzo[b]furan (BNC105), a Tubulin Polymerization Inhibitor with Potent Antiproliferative and Tumor Vascular Disrupting Properties. *J. Med. Chem.* **2011**, *54*, 6014-6027. DOI: 10.1021/jm200454y.

26. Sanghai, N.; Jain, V.; Preet, R.; Kandekar, S.; Das, S.; Trivedi, N.; Mohapatra, P.; Priyadarshani, G.; Kashyap, M.; Das, D.; Satapathy, S. R.; Siddharth, S.; Guchhait, S. K.; Kundu, C. N.; Bharatam, P. V. Combretastatin A-4 inspired novel 2-aryl-3-arylamino-imidazo-pyridines/pyrazines as tubulin polymerization inhibitors, antimitotic and anticancer agents. *MedChemComm.* **2014**, *5*, 766-782. DOI: 10.1039/C3MD00357D.

27. Yan, J.; Pang, Y.; Chen, J.; Sheng, J.; Hu, J.; Huang, L.; Li, X. Synthesis, biological evaluation and mechanism study of a class of cyclic combretastatin A-4 analogues as novel antitumour agents. *RSC Adv.* **2015**, *5*, 98527-98537. DOI: 10.1039/C5RA19270F.

28. De Martino, G.; La Regina, G.; Coluccia, A.; Edler, M. C.; Barbera, M. C.; Brancale, A.; Wilcox, E.; Hamel, E.; Artico, M.; Silvestri, R. Arylthioindoles, Potent Inhibitors of Tubulin Polymerization. *J. Med. Chem.* **2004**, *47*, 6120-6123. DOI: 10.1021/jm049360d.

29. De Martino, G.; Edler, M. C.; La Regina, G.; Coluccia, A.; Barbera, M. C.; Barrow, D.; Nicholson, R. I.; Chiosis, G.; Brancale, A.; Hamel, E.; Artico, M.; Silvestri, R. New Arylthioindoles: Potent Inhibitors of Tubulin Polymerization. 2. Structure–Activity

Relationships and Molecular Modeling Studies. *J. Med. Chem.* **2006**, *49*, 947-954. DOI: 10.1021/jm050809s.

30. La Regina, G.; Sarkar, T.; Bai, R.; Edler, M. C.; Saletti, R.; Coluccia, A.; Piscitelli, F.; Minelli, L.; Gatti, V.; Mazzoccoli, C.; Palermo, V.; Mazzoni, C.; Falcone, C.; Scovassi, A. I.; Giansanti, V.; Campiglia, P.; Porta, A.; Maresca, B.; Hamel, E.; Brancale, A.; Novellino, E.; Silvestri, R. New Arylthioindoles and Related Bioisosteres at the Sulfur Bridging Group. 4. Synthesis, Tubulin Polymerization, Cell Growth Inhibition, and Molecular Modeling Studies. *J. Med. Chem.* **2009**, *52*, 7512-7527. DOI: 10.1021/jm900016t.

31. Colley, H. E.; Muthana, M.; Danson, S. J.; Jackson, L. V.; Brett, M. L.; Harrison, J.; Coole, S. F.; Mason, D. P.; Jennings, L. R.; Wong, M.; Tulasi, V.; Norman, D.; Lockey, P. M.; Williams, L.; Dossetter, A. G.; Griffen, E. J.; Thompson, M. J. An Orally Bioavailable, Indole-3-glyoxylamide Based Series of Tubulin Polymerization Inhibitors Showing Tumor Growth Inhibition in a Mouse Xenograft Model of Head and Neck Cancer. *J. Med. Chem.* **2015**, *58*, 9309-9333. DOI: 10.1021/acs.jmedchem.5b01312.

32. Wen, Z.; Xu, J.; Wang, Z.; Qi, H.; Xu, Q.; Bai, Z.; Zhang, Q.; Bao, K.; Wu, Y.; Zhang, W. 3-(3,4,5-Trimethoxyphenylselenyl)-1H-indoles and their selenoxides as combretastatin A-4 analogs: Microwave-assisted synthesis and biological evaluation. *Eur. J. Med. Chem.* **2015**, *90*, 184-194. DOI: 10.1016/j.ejmech.2014.11.024.

33. Diao, P. C.; Li, Q.; Hu, M.-J.; Ma, Y.-F.; You, W.-W.; Hong, K. H.; Zhao, P.-L. Synthesis and biological evaluation of novel indole-pyrimidine hybrids bearing morpholine and thiomorpholine moieties. *Eur. J. Med. Chem.* **2017**, *134*, 110-118. DOI: 10.1016/j.ejmech.2017.04.011.

34. La Regina, G.; Bai, R.; Rensen, W.; Coluccia, A.; Piscitelli, F.; Gatti, V.; Bolognesi, A.; Lavecchia, A.; Granata, I.; Porta, A.; Maresca, B.; Soriani, A.; Iannitto, M. L.; Mariani, M.; Santoni, A.; Brancale, A.; Ferlini, C.; Dondio, G.; Varasi, M.; Mercurio, C.; Hamel, E.; Lavia, P.; Novellino, E.; Silvestri, R. Design and Synthesis of 2-Heterocyclyl-3-arylthio-1H-indoles as Potent Tubulin Polymerization and Cell Growth Inhibitors with Improved Metabolic Stability. *J. Med. Chem.* **2011**, *54*, 8394-8406. DOI: 10.1021/jm2012886.

35. La Regina, G.; Bai, R.; Rensen, W. M.; Di Cesare, E.; Coluccia, A.; Piscitelli, F.; Famiglini, V.; Reggio, A.; Nalli, M.; Pelliccia, S.; Da Pozzo, E.; Costa, B.; Granata, I.; Porta, A.; Maresca, B.; Soriani, A.; Iannitto, M. L.; Santoni, A.; Li, J.; Miranda Cona, M.; Chen, F.; Ni, Y.; Brancale, A.; Dondio, G.; Vultaggio, S.; Varasi, M.; Mercurio, C.; Martini, C.; Hamel, E.; Lavia, P.; Novellino, E.; Silvestri, R. Toward Highly Potent Cancer Agents by Modulating the C-2 Group of the Arylthioindole Class of Tubulin Polymerization Inhibitors. *J. Med. Chem.* **2013**, *56*, 123-149. DOI: 10.1021/jm3013097.

36. La Regina, G.; Bai, R.; Coluccia, A.; Famiglini, V.; Pelliccia, S.; Passacantilli, S.; Mazzoccoli, C.; Ruggieri, V.; Verrico, A.; Miele, A.; Monti, L.; Nalli, M.; Alfonsi, R.; Di Marcotullio, L.; Gulino, A.; Ricci, B.; Soriani, A.; Santoni, A.; Caraglia, M.; Porto, S.; Da Pozzo, E.; Martini, C.; Brancale, A.; Marinelli, L.; Novellino, E.; Vultaggio, S.; Varasi, M.; Mercurio, C.; Bigogno, C.; Dondio, G.; Hamel, E.; Lavia, P.; Silvestri, R. New Indole Tubulin Assembly Inhibitors Cause Stable Arrest of Mitotic Progression, Enhanced Stimulation of Natural Killer Cell Cytotoxic Activity, and Repression of Hedgehog-Dependent Cancer. *J. Med. Chem.* **2015**, *58*, 5789-5807. DOI: 10.1021/acs.jmedchem.5b00310.

37. MacDonough, M. T.; Strecker, T. E.; Hamel, E.; Hall, J. J.; Chaplin, D. J.; Trawick, M. L.; Pinney, K. G. Synthesis and biological evaluation of indole-based, anti-cancer agents inspired by the vascular disrupting agent 2-(3'-hydroxy-4'-methoxyphenyl)-3-(3'',4'',5''-



trimethoxybenzoyl)-6-methoxyindole (OXi8006). *Bioorg. Med. Chem.* **2013**, *21*, 6831-6843.

DOI: 10.1016/j.bmc.2013.07.028.

38. Owa, T.; Yokoi, A.; Yamazaki, K.; Yoshimatsu, K.; Yamori, T.; Nagasu, T. Array-Based Structure and Gene Expression Relationship Study of Antitumor Sulfonamides Including N-[2-[(4-Hydroxyphenyl)amino]-3-pyridinyl]-4-methoxybenzenesulfonamide and N-(3-Chloro-7-indolyl)-1,4-benzenedisulfonamide. *J. Med. Chem.* **2002**, *45*, 4913-4922. DOI: 10.1021/jm0201060.

39. Owa, T.; Okauchi, T.; Yoshimatsu, K.; Sugi, N. H.; Ozawa, Y.; Nagasu, T.; Koyanagi, N.; Okabe, T.; Kitoh, K.; Yoshino, H. A focused compound library of novel N-(7-indolyl)benzenesulfonamides for the discovery of potent cell cycle inhibitors. *Bioorg. Med. Chem. Lett.* **2000**, *10*, 1223-1226. DOI: 10.1016/S0960-894X(00)00219-5.

40. Yokoi, A.; Kuromitsu, J.; Kawai, T.; Nagasu, T.; Hata Sugi, N.; Yoshimatsu, K.; Yoshino, H.; Owa, T. Profiling Novel Sulfonamide Antitumor Agents with Cell-based Phenotypic Screens and Array-based Gene Expression Analysis. *Mol. Cancer. Ther.* **2002**, *1*, 275-286.

41. Chang, J.-Y.; Hsieh, H.-P.; Chang, C.-Y.; Hsu, K.-S.; Chiang, Y.-F.; Chen, C.-M.; Kuo, C.-C.; Liou, J.-P. 7-Aroyl-aminoindoline-1-sulfonamides as a Novel Class of Potent Antitubulin Agents. *J. Med. Chem.* **2006**, *49*, 6656-6659. DOI: 10.1021/jm061076u.

42. Wang, Y.-M.; Hu, L.-X.; Liu, Z.-M.; You, X.-F.; Zhang, S.-H.; Qu, J.-R.; Li, Z.-R.; Li, Y.; Kong, W.-J.; He, H.-W.; Shao, R.-G.; Zhang, L.-R.; Peng, Z.-G.; Boykin, D. W.; Jiang, J.-D. N-(2,6-Dimethoxypyridine-3-yl)-9-Methylcarbazole-3-Sulfonamide as a Novel Tubulin Ligand against Human Cancer. *Clin. Cancer. Res.* **2008**, *14*, 6218-6227. DOI: 10.1158/1078-0432.Ccr-08-0550.

43. Shan, B.; Medina, J. C.; Santha, E.; Frankmoelle, W. P.; Chou, T. C.; Learned, R. M.; Narbut, M. R.; Stott, D.; Wu, P.; Jaen, J. C.; Rosen, T.; Timmermans, P. B.; Beckmann, H. Selective, covalent modification of beta-tubulin residue Cys-239 by T138067, an antitumor agent with in vivo efficacy against multidrug-resistant tumors. *Proc. Natl. Acad. Sci. U.S.A.* **1999**, *96*, 5686-91. DOI: 10.1073/pnas.96.10.5686.
44. Reddy, M. V. R.; Mallireddigari, M. R.; Pallela, V. R.; Cosenza, S. C.; Billa, V. K.; Akula, B.; Subbaiah, D. R. C. V.; Bharathi, E. V.; Padgaonkar, A.; Lv, H.; Gallo, J. M.; Reddy, E. P. Design, Synthesis, and Biological Evaluation of (E)-N-Aryl-2-arylethanesulfonamide Analogues as Potent and Orally Bioavailable Microtubule-Targeted Anticancer Agents. *J. Med. Chem.* **2013**, *56*, 5562-5586. DOI: 10.1021/jm400575x.
45. Popowycz, F.; Schneider, C.; DeBonis, S.; Skoufias, D. A.; Kozielski, F.; Galmarini, C. M.; Joseph, B. Synthesis and antiproliferative evaluation of pyrazolo[1,5-a]-1,3,5-triazine myoseverin derivatives. *Bioorg. Med. Chem.* **2009**, *17*, 3471-3478. DOI: 10.1016/j.bmc.2009.03.007.
46. Moon, H.-S.; Jacobson, E. M.; Khersonsky, S. M.; Luzung, M. R.; Walsh, D. P.; Xiong, W.; Lee, J. W.; Parikh, P. B.; Lam, J. C.; Kang, T.-W.; Rosania, G. R.; Schier, A. F.; Chang, Y.-T. A Novel Microtubule Destabilizing Entity from Orthogonal Synthesis of Triazine Library and Zebrafish Embryo Screening. *J. Am. Chem. Soc.* **2002**, *124*, 11608-11609. DOI: 10.1021/ja026720i.
47. Chang, Y.-T.; Wignall, S. M.; Rosania, G. R.; Gray, N. S.; Hanson, S. R.; Su, A. I.; Merlie, J.; Moon, H.-S.; Sangankar, S. B.; Perez, O.; Heald, R.; Schultz, P. G. Synthesis and Biological Evaluation of Myoseverin Derivatives: Microtubule Assembly Inhibitors. *J. Med. Chem.* **2001**, *44*, 4497-4500. DOI: 10.1021/jm010451+.

48. Kryštof, V.; Moravcová, D.; Paprskářová, M.; Barbier, P.; Peyrot, V.; Hlobilková, A.; Havlíček, L.; Strnad, M. Synthesis and biological activity of 8-azapurine and pyrazolo[4,3-d]pyrimidine analogues of myoseverin. *Eur. J. Med. Chem.* **2006**, *41*, 1405-1411. DOI: 10.1016/j.ejmech.2006.07.004.
49. Kuo, S. C.; Lee, H. Z.; Juang, J. P.; Lin, Y. T.; Wu, T. S.; Chang, J. J.; Lednicer, D.; Paull, K. D.; Lin, C. M. Synthesis and cytotoxicity of 1,6,7,8-substituted 2-(4'-substituted phenyl)-4-quinolones and related compounds: identification as antimitotic agents interacting with tubulin. *J. Med. Chem.* **1993**, *36*, 1146-1156. DOI: 10.1021/jm00061a005.
50. Abad, A.; López-Pérez, J. L.; del Olmo, E.; García-Fernández, L. F.; Francesch, A.; Trigili, C.; Barasoain, I.; Andreu, J. M.; Díaz, J. F.; San Feliciano, A. Synthesis and Antimitotic and Tubulin Interaction Profiles of Novel Pinacol Derivatives of Podophyllotoxins. *J. Med. Chem.* **2012**, *55*, 6724-6737. DOI: 10.1021/jm2017573.
51. Labruère, R.; Gautier, B.; Testud, M.; Seguin, J.; Lenoir, C.; Desbène-Finck, S.; Helissey, P.; Garbay, C.; Chabot, G. G.; Vidal, M.; Giorgi-Renault, S. Design, Synthesis, and Biological Evaluation of the First Podophyllotoxin Analogues as Potential Vascular-Disrupting Agents. *ChemMedChem.* **2010**, *5*, 2016-2025. DOI: 10.1002/cmdc.201000305.
52. Prinz, H.; Ishii, Y.; Hirano, T.; Stoiber, T.; Camacho Gomez, J. A.; Schmidt, P.; Düssmann, H.; Burger, A. M.; Prehn, J. H. M.; Günther, E. G.; Unger, E.; Umezawa, K. Novel Benzylidene-9(10H)-anthracenones as Highly Active Antimicrotubule Agents. Synthesis, Antiproliferative Activity, and Inhibition of Tubulin Polymerization. *J. Med. Chem.* **2003**, *46*, 3382-3394. DOI: 10.1021/jm0307685.
53. Zuse, A.; Schmidt, P.; Baasner, S.; Böhm, K. J.; Müller, K.; Gerlach, M.; Günther, E. G.; Unger, E.; Prinz, H. Sulfonate Derivatives of Naphtho[2,3-b]thiophen-4(9H)-one and

9(10H)-Anthracenone as Highly Active Antimicrotubule Agents. Synthesis, Antiproliferative Activity, and Inhibition of Tubulin Polymerization. *J. Med. Chem.* **2007**, *50*, 6059-6066. DOI: 10.1021/jm0708984.

54. Prinz, H.; Schmidt, P.; Böhm, K. J.; Baasner, S.; Müller, K.; Unger, E.; Gerlach, M.; Günther, E. G. 10-(2-oxo-2-Phenylethylidene)-10H-anthracen-9-ones as Highly Active Antimicrotubule Agents: Synthesis, Antiproliferative Activity, and Inhibition of Tubulin Polymerization. *J. Med. Chem.* **2009**, *52*, 1284-1294. DOI: 10.1021/jm801338r.

55. Surkau, G.; Böhm, K. J.; Müller, K.; Prinz, H. Synthesis, antiproliferative activity and inhibition of tubulin polymerization by anthracenone-based oxime derivatives. *Eur. J. Med. Chem.* **2010**, *45*, 3354-3364. DOI: 10.1016/j.ejmech.2010.04.019.

56. Prinz, H.; Schmidt, P.; Böhm, K. J.; Baasner, S.; Müller, K.; Gerlach, M.; Günther, E. G.; Unger, E. Phenylimino-10H-anthracen-9-ones as novel antimicrotubule agents—synthesis, antiproliferative activity and inhibition of tubulin polymerization. *Bioorg. Med. Chem.* **2011**, *19*, 4183-4191. DOI: 10.1016/j.bmc.2011.06.010.

57. Silva-García, E. M.; Cerda-García-Rojas, C. M.; del Río, R. E.; Joseph-Nathan, P. Parvifoline Derivatives as Tubulin Polymerization Inhibitors. *J. Nat. Prod.* **2019**, *82*, 840-849. DOI: 10.1021/acs.jnatprod.8b00860.

58. Wang, Y.; Zhang, H.; Gigant, B.; Yu, Y.; Wu, Y.; Chen, X.; Lai, Q.; Yang, Z.; Chen, Q.; Yang, J. Structures of a diverse set of colchicine binding site inhibitors in complex with tubulin provide a rationale for drug discovery. *FEBS J.* **2016**, *283*, 102-111. DOI: 10.1111/febs.13555.

59. Wang, Q.; Arnst, K. E.; Wang, Y.; Kumar, G.; Ma, D.; White, S. W.; Miller, D. D.; Li, W.; Li, W. Structure-Guided Design, Synthesis, and Biological Evaluation of (2-(1H-Indol-3-

yl)-1H-imidazol-4-yl)(3,4,5-trimethoxyphenyl) Methanone (ABI-231) Analogues Targeting the Colchicine Binding Site in Tubulin. *J. Med. Chem.* **2019**, *62*, 6734-6750. DOI: 10.1021/acs.jmedchem.9b00706.
